# Supplementary material for: Electroacupuncture versus manual acupuncture in the treatment of plantar heel pain syndrome: study protocol for an upcoming randomised controlled trial
Source: PubMed Central journal article supplement — BMJ Open. 2019 Apr 3;9(4):e026147. doi: 10.1136/bmjopen-2018-026147 (PMC6500181; doi:10.1136/bmjopen-2018-026147), 2019-04-03
Supplement: bmjopen-2018-026147.draft_revisions.pdf [file bmjopen-2018-026147.draft_revisions.pdf]

# BMJ Open

BMJ Open is committed to open peer review. As part of this commitment we make the peer review history of every article we publish publicly available.

When an article is published we post the peer reviewers' comments and the authors' responses online. We also post the versions of the paper that were used during peer review. These are the versions that the peer review comments apply to.

The versions of the paper that follow are the versions that were submitted during the peer review process. They are not the versions of record or the final published versions. They should not be cited or distributed as the published version of this manuscript.

BMJ Open is an open access journal and the full, final, typeset and author-corrected version of record of the manuscript is available on our site with no access controls, subscription charges or pay-per-view fees (<http://bmjopen.bmj.com>).

If you have any questions on BMJ Open's open peer review process please email [info.bmjopen@bmj.com](mailto:info.bmjopen@bmj.com)

# BMJ Open

## Electroacupuncture versus manual acupuncture in the treatment of plantar fasciitis: study protocol for an upcoming randomized controlled trial

|                               |                                                                                                                                                                                                                                                                                                                                                                                                                                                                                   |
|-------------------------------|-----------------------------------------------------------------------------------------------------------------------------------------------------------------------------------------------------------------------------------------------------------------------------------------------------------------------------------------------------------------------------------------------------------------------------------------------------------------------------------|
| Journal:                      | <i>BMJ Open</i>                                                                                                                                                                                                                                                                                                                                                                                                                                                                   |
| Manuscript ID                 | bmjopen-2018-026147                                                                                                                                                                                                                                                                                                                                                                                                                                                               |
| Article Type:                 | Protocol                                                                                                                                                                                                                                                                                                                                                                                                                                                                          |
| Date Submitted by the Author: | 19-Aug-2018                                                                                                                                                                                                                                                                                                                                                                                                                                                                       |
| Complete List of Authors:     | WANG, Weiming; Guang'anmen Hospital, China Academy of Chinese Medical Sciences, Department of acupuncture<br>Liu, Yan<br>Zhao, Jie; Guang'anmen Hospital, China Academy of Chinese Medical Sciences, Department of acupuncture<br>Jiao, Ruimin; Guang'anmen Hospital, China Academy of Chinese Medical Sciences, Department of acupuncture<br>Liu, zhishun; Guang'an men Hospital Affiliated to China Academy of Chinese Medical Sciences, acupuncture and moxibustion department |
| Keywords:                     | acupuncture, randomized controlled trial, plantar fasciitis, protocol                                                                                                                                                                                                                                                                                                                                                                                                             |
|                               |                                                                                                                                                                                                                                                                                                                                                                                                                                                                                   |

SCHOLARONE™  
Manuscripts

1  
2  
3 Title page  
4  
5

6 Article title:  
7  
8

9 **Electroacupuncture versus manual acupuncture in the treatment of**  
10 **plantar fasciitis: study protocol for an upcoming randomized**  
11 **controlled trial**  
12  
13  
14  
15

16  
17  
18  
19 Weiming Wang,<sup>1</sup> Yan Liu,<sup>2</sup> Jie Zhao,<sup>1</sup> Ruimin Jiao,<sup>1</sup> Zhishun Liu<sup>1\*</sup>  
20  
21

22  
23 <sup>1</sup>Department of Acupuncture, Guang'anmen Hospital, China Academy of Chinese  
24 Medical Sciences, Beijing, China  
25

26  
27 <sup>2</sup> Institute of Basic Research in Clinical Medicine, China Academy of Chinese  
28 Medical Sciences, Beijing, China  
29  
30

31  
32 Corresponding author: Department of Acupuncture and Moxibustion, Guang' an Men  
33 Hospital, China Academy of Chinese Medical Sciences, No.5 Beixiang St., Xicheng  
34 District, Beijing, China, Email: zhishunjournal@163.com.  
35  
36  
37  
38

39  
40 **Word count: abstract:292; main text:3132**  
41  
42

43 **Funding** This RCT is funded by Guang'anmen Hospital, China Academy of Chinese  
44 Medical Sciences, China (Grant No. 2017S393).  
45  
46  
47  
48  
49  
50  
51  
52  
53  
54  
55  
56

## Abstract

**Introduction:** Plantar fasciitis is a common cause of heel pain. It may worsen a patient's quality of life, and potentially lead to knee, hip, or lower back problems.

Previous studies have shown that electroacupuncture and manual acupuncture are effective treatments for relieving pain in patients with plantar fasciitis. However, little evidence supports the use of one intervention over the other.

**Methods and analysis:** A total of 92 patients diagnosed with plantar fasciitis will be recruited and randomly assigned to an electroacupuncture group or a manual acupuncture group at a ratio of 1:1. Patients in both groups will receive a 30-min acupuncture treatment (3 times per week) for a total of 12 sessions over 4 weeks. The primary outcome will be the proportion of patients with at least 50% reduction from baseline in the worst pain intensity measured by visual analog scale (0 to 100, higher scores signify worse pain) at first steps in the morning after 4-week treatment. The secondary outcomes will include change in worst pain intensity at first steps in the morning, change in mean pain intensity at first steps in the morning, change in worst pain intensity during the day, change in mean pain intensity during the day, change in the pressure pain threshold, change in ankle-dorsiflexion range of motion, change in Foot and Ankle Ability Measure total score and subscale scores, patients' global improvement assessment, patients' expectations for acupuncture, and safety evaluation. We will perform all statistical analysis following the intention-to-treat principle.

1  
2  
3  
4 **Ethics and dissemination:** The study has been approved by our ethics review board  
5  
6 (Protocol Approval No. 2018-010-KY). The study findings will be disseminated  
7  
8 through presentation at a high-impact medical journal, with online access. We also to  
9  
10 plan to present it in select conferences and scientific meetings.  
11  
12

13 **Trial registration:** Chinese Clinical Trial Registry identifier: ChiCTR-1800016531,  
14  
15 registered 7 June 2018.  
16  
17

18 **Strengths and limitations of this study:**  
19

20 ▶ This study is the first randomized controlled trial comparing electroacupuncture  
21  
22 versus manual acupuncture for pain relief in participants with planter fasciitis.  
23  
24

25 ▶ Strictly standardized endpoints and objective criteria, long-term follow-up, strict  
26  
27 quality control, and evaluation of patients' expectations for acupuncture.  
28  
29

30 ▶ The results might not apply to primary hospital or other countries. Participants and  
31  
32 the acupuncturist will not be blinded due to the nature of the study. A placebo/sham/  
33  
34 wait list group was not assigned.  
35  
36  
37  
38  
39  
40  
41  
42  
43  
44  
45  
46  
47  
48  
49  
50  
51  
52  
53  
54  
55  
56  
57  
58  
59  
60

## Background

Plantar fasciitis (PF), a common cause of heel pain,<sup>1</sup> is characterized by pain exacerbated with the first walking in the morning or after a long period of rest.<sup>2</sup> In the United States, more than 2 million people per year seek treatment due to heel pain,<sup>3</sup> and approximately 10% of the general population is affected by heel pain during their lives.<sup>4</sup> Excluding conditions such as fat pad atrophy, plantar fibromatosis, and calcaneal stress fracture, symptoms of plantar heel pain are attributed to PF in 80% of patients.<sup>5</sup> Patients ranging in age from 40 to 60 years comprise the largest affected 20-year age group.<sup>6</sup> PF usually occurs unilaterally with bilateral involvement occurring only 30% of the time.<sup>7</sup> Common risk factors known to be associated with PF include obesity, decreased ankle dorsiflexion or shortened/tight achilles tendon, excessive running, pes cavus (high arched foot type), and pes planus (flat foot).<sup>5 6 8</sup> PF may worsen a patient's quality of life,<sup>9</sup> and potentially lead to knee, hip, or lower back problems.

PF likely has multiple etiologies in combination with degeneration and inflammation.<sup>10</sup> The healing time of PF generally varies from 6 to 18 months, although it is a self-limiting condition.<sup>7 11</sup> Drug-therapy (e.g., oral analgesics and corticosteroid injections) and surgery are the two of the most common approaches used in treating PF.<sup>12</sup> However, oral analgesics and corticosteroid injections do not provide sustained pain relief effect,<sup>13</sup> and corticosteroid injections may be associated with plantar fascia rupture and plantar fat pad atrophy.<sup>10</sup> Surgical intervention is indicated only after at least 6 to 12 months of conservative treatment has failed.<sup>14</sup>

1  
2  
3 Moreover, some patients are resistant to surgery because of fear or cost. There is little  
4  
5 convincing evidence available to support various approaches for treating PF.<sup>15</sup>  
6  
7

8 Acupuncture, a traditional Chinese medicine, has been used to treat a variety of  
9  
10 musculoskeletal pain-related conditions (including PF) for thousands of years. Two  
11  
12 recent systematic reviews concerning the effectiveness of acupuncture in treating PF  
13  
14 have concluded that compared to the evidence available for conventionally used  
15  
16 interventions (e.g., stretching, night splints, or dexamethasone), little evidence  
17  
18 supports the effectiveness of electroacupuncture (EA) and manual acupuncture (MA)  
19  
20 for reducing PF pain. They also state that acupuncture should be included in  
21  
22 recommendations for the treatment of PF.<sup>16 17</sup>  
23  
24  
25  
26  
27

28 EA and MA are the two acupuncture modalities frequently used which may exert  
29  
30 different therapeutic effects via different mechanisms related to the characteristics of  
31  
32 diseases.<sup>18</sup> EA has been indicated in some cases where treatment with traditional  
33  
34 acupuncture has failed. Moreover, it has been demonstrated to produce a faster and  
35  
36 better analgesic effect than MA.<sup>19 20</sup>  
37  
38  
39

40 To our knowledge, until now no randomized controlled clinical research has  
41  
42 analyzed the effectiveness of EA versus MA in treating PF. The objective of this  
43  
44 study is to assess whether EA was superior to MA in reducing PF pain.  
45  
46  
47  
48  
49  
50  
51  
52  
53  
54  
55  
56

## Methods and design

### Study design

We will conduct a prospective randomized parallel-group assessor-blinded two-arm trial. The standard protocol items including Recommendations for Interventional Trials (SPIRIT)<sup>21</sup> and the Standards for Reporting Interventions in Clinical Trials of Acupuncture (STRICTA)<sup>22</sup> guidelines were followed during the development of the protocol of this study. The flow chart is shown in Fig. 1 and the time point of assessment is shown in Fig. 2. The study was planned in accordance with the Helsinki Declaration and was approved by the Ethical Committee of the Guang'anmen Hospital, China Academy of Chinese Medical Sciences (No. 2018-010-KY). The trial has been registered at Chinese Clinical Trial Registry. Any modifications to the protocol will be reported and approved by the Ethical Committee of the Guang'anmen Hospital, China Academy of Chinese Medical Sciences and will be communicated with the trial registry, investigators and data monitoring researchers.

### Study setting and recruitment

This trial will be performed at Guang'anmen Hospital, China Academy of Chinese Medical Sciences between October 2018 and December 2019. A total of 92 participants will be recruited through posters, hospital webs, and networks. The duration of the study for each participant will be 29 weeks: 1-week baseline, 4-week treatment, and 24-week follow-up.

### Randomization and blinding

A 1-week baseline assessment will be needed before randomization. Participants will



1  
2  
3 be randomly assigned to either the EA or MA group at a ratio of 1:1. To ensure equal  
4  
5  
6 distribution in treatment groups, the random block is set to a fixed size of 4. The  
7  
8 randomizing scheme will be generated using the Statistics Analysis System (SAS)  
9  
10 software created by the Clinical Pharmacological Assessment Center at Guang'anmen  
11  
12 Hospital. Random numbers and assigned groups were signed and sealed in an opaque  
13  
14 envelope by the staff who produced it and kept by other staff who took no part in this  
15  
16 trial. Research assistants who did not participant in the assessment and treatment will  
17  
18 open the envelopes according to the sequence numbers. The research assistants will  
19  
20 be in charge of recruitment and data collection, and an orthopedist will be in charge of  
21  
22 the diagnosis of the participants. Participants and the acupuncturist will not be blinded  
23  
24 to the allocation. The efficacy evaluator will be blinded.  
25  
26  
27  
28  
29  
30  
31  
32

### 33 **Participants**

#### 34 **Inclusion criteria:**

35  
36 Participants aged from 18 to 75 years will be included in the study if they meet the  
37  
38 diagnostic criteria for PF according to the Orthopaedic Section of American Physical  
39  
40 Therapy Association,<sup>23</sup> and conform to all the following conditions for at least  
41  
42 1 month:  
43  
44  
45

- 46  
47 (1) Pain localized to the plantar medial aspect of the heel along the insertion of the  
48  
49 plantar fascia;
- 50  
51 (2) Most noticeable plantar medial heel pain with initial steps after a period of  
52  
53 inactivity (e.g., initial steps in the morning) but also worse following prolonged  
54  
55

1  
2  
3 weight bearing;

4  
5  
6 (3) Palpation/provocation over the medial calcaneal tuberosity or along the plantar

7  
8 fascia;

9  
10 (4) Active and passive talocrural dorsiflexion range of motion;

11  
12 (5) Positive windlass test as well as negative tarsal tunnel tests;

13  
14 (6) A minimum score of 40 in worst pain intensity at first steps in the morning  
15 according to the 100-point visual analog scale (VAS); and

16  
17 (7) Signed the informed consent prior to inclusion.  
18  
19  
20  
21  
22  
23  
24

### 25 **Exclusion criteria:**

26  
27 Participants who fulfill any of the following criteria will be excluded:

28  
29 (1) A history of ankle and foot fracture, surgery or tumor, or have a foot deformity;

30  
31 (2) A history of plantar fascia rupture, nerve entrapment syndrome, or achilles tendon  
32 lesions;

33  
34 (3) Neurological or systemic diseases including rheumatoid arthritis, diabetes,  
35 cardiovascular disorder, severe hepatic/renal insufficiency, or coagulation disorder;

36  
37 (4) Existing systemic or local infection, or chapped heel skin;

38  
39 (5) Used local corticosteroid injections in the last 6 months;

40  
41 (6) Needle-phobic patients or had received EA or MA in the past 4 weeks.  
42  
43  
44  
45  
46  
47  
48  
49  
50  
51

### 52 **Intervention and comparison**

53  
54  
55  
56  
57  
58  
59  
60

1  
2  
3  
4 The intervention protocol of this trial is based on the meridian theory of traditional  
5  
6 Chinese medicine and the consensus of three acupuncture specialists, it is also used in  
7  
8 a systematic review.<sup>16</sup> Acupuncturists who hold an acupuncture license and have at  
9  
10 least 1-year of experience in acupuncture will perform the treatment. Disposable  
11  
12 acupuncture needle (size 0.30×40 mm) and SDZ-V EA apparatus (all Hwato Brand,  
13  
14 Suzhou Medical Appliance Factory, Suzhou, China) will be used in this trial.  
15  
16 Acupuncture will be given on the heel pain side. If a subject experienced PF on both  
17  
18 sides, the treatment will be performed on both sides with the more serious side  
19  
20  
21  
22  
23 evaluated.

### 24 25 26 27 28 **EA group**

29  
30 Two Ashi points (the severer tender points over the anteromedial aspect of the heels),  
31  
32 Chengshan (BL57), Taixi (KI3) and Kunlun (BL60) were selected in this trial. The  
33  
34 location of the acupoints will be based on *Nomenclature and location of acupuncture*  
35  
36 *points*<sup>24</sup> drafted in 2006 by the National Standard of the People's Republic of China  
37  
38 (GB/T 12346–2006). After the local skin was routinely sterilized in a prone position,  
39  
40 the participants' Ashi points, BL57, KI3, and BL60 will be vertically inserted by the  
41  
42 needles to a depth of 10 to 15 mm to the plantar fascia layer. All needles other than  
43  
44 Ashi points will be gently stimulated by lifting and thrusting combined with twirling  
45  
46 and rotating the needle to reach *de qi* (the sensation of sourness, numbness, swelling  
47  
48 and heaviness).<sup>25</sup> Paired alligator clips of the EA apparatus will be attached to the  
49  
50  
51  
52  
53  
54  
55  
56  
57  
58  
59  
60  
61  
62  
63  
64  
65  
66  
67  
68  
69  
70  
71  
72  
73  
74  
75  
76  
77  
78  
79  
80  
81  
82  
83  
84  
85  
86  
87  
88  
89  
90  
91  
92  
93  
94  
95  
96  
97  
98  
99  
100  
101  
102  
103  
104  
105  
106  
107  
108  
109  
110  
111  
112  
113  
114  
115  
116  
117  
118  
119  
120  
121  
122  
123  
124  
125  
126  
127  
128  
129  
130  
131  
132  
133  
134  
135  
136  
137  
138  
139  
140  
141  
142  
143  
144  
145  
146  
147  
148  
149  
150  
151  
152  
153  
154  
155  
156  
157  
158  
159  
160  
161  
162  
163  
164  
165  
166  
167  
168  
169  
170  
171  
172  
173  
174  
175  
176  
177  
178  
179  
180  
181  
182  
183  
184  
185  
186  
187  
188  
189  
190  
191  
192  
193  
194  
195  
196  
197  
198  
199  
200  
201  
202  
203  
204  
205  
206  
207  
208  
209  
210  
211  
212  
213  
214  
215  
216  
217  
218  
219  
220  
221  
222  
223  
224  
225  
226  
227  
228  
229  
230  
231  
232  
233  
234  
235  
236  
237  
238  
239  
240  
241  
242  
243  
244  
245  
246  
247  
248  
249  
250  
251  
252  
253  
254  
255  
256  
257  
258  
259  
260  
261  
262  
263  
264  
265  
266  
267  
268  
269  
270  
271  
272  
273  
274  
275  
276  
277  
278  
279  
280  
281  
282  
283  
284  
285  
286  
287  
288  
289  
290  
291  
292  
293  
294  
295  
296  
297  
298  
299  
300  
301  
302  
303  
304  
305  
306  
307  
308  
309  
310  
311  
312  
313  
314  
315  
316  
317  
318  
319  
320  
321  
322  
323  
324  
325  
326  
327  
328  
329  
330  
331  
332  
333  
334  
335  
336  
337  
338  
339  
340  
341  
342  
343  
344  
345  
346  
347  
348  
349  
350  
351  
352  
353  
354  
355  
356  
357  
358  
359  
360  
361  
362  
363  
364  
365  
366  
367  
368  
369  
370  
371  
372  
373  
374  
375  
376  
377  
378  
379  
380  
381  
382  
383  
384  
385  
386  
387  
388  
389  
390  
391  
392  
393  
394  
395  
396  
397  
398  
399  
400  
401  
402  
403  
404  
405  
406  
407  
408  
409  
410  
411  
412  
413  
414  
415  
416  
417  
418  
419  
420  
421  
422  
423  
424  
425  
426  
427  
428  
429  
430  
431  
432  
433  
434  
435  
436  
437  
438  
439  
440  
441  
442  
443  
444  
445  
446  
447  
448  
449  
450  
451  
452  
453  
454  
455  
456  
457  
458  
459  
460  
461  
462  
463  
464  
465  
466  
467  
468  
469  
470  
471  
472  
473  
474  
475  
476  
477  
478  
479  
480  
481  
482  
483  
484  
485  
486  
487  
488  
489  
490  
491  
492  
493  
494  
495  
496  
497  
498  
499  
500  
501  
502  
503  
504  
505  
506  
507  
508  
509  
510  
511  
512  
513  
514  
515  
516  
517  
518  
519  
520  
521  
522  
523  
524  
525  
526  
527  
528  
529  
530  
531  
532  
533  
534  
535  
536  
537  
538  
539  
540  
541  
542  
543  
544  
545  
546  
547  
548  
549  
550  
551  
552  
553  
554  
555  
556  
557  
558  
559  
560  
561  
562  
563  
564  
565  
566  
567  
568  
569  
570  
571  
572  
573  
574  
575  
576  
577  
578  
579  
580  
581  
582  
583  
584  
585  
586  
587  
588  
589  
590  
591  
592  
593  
594  
595  
596  
597  
598  
599  
600  
601  
602  
603  
604  
605  
606  
607  
608  
609  
610  
611  
612  
613  
614  
615  
616  
617  
618  
619  
620  
621  
622  
623  
624  
625  
626  
627  
628  
629  
630  
631  
632  
633  
634  
635  
636  
637  
638  
639  
640  
641  
642  
643  
644  
645  
646  
647  
648  
649  
650  
651  
652  
653  
654  
655  
656  
657  
658  
659  
660  
661  
662  
663  
664  
665  
666  
667  
668  
669  
670  
671  
672  
673  
674  
675  
676  
677  
678  
679  
680  
681  
682  
683  
684  
685  
686  
687  
688  
689  
690  
691  
692  
693  
694  
695  
696  
697  
698  
699  
700  
701  
702  
703  
704  
705  
706  
707  
708  
709  
710  
711  
712  
713  
714  
715  
716  
717  
718  
719  
720  
721  
722  
723  
724  
725  
726  
727  
728  
729  
730  
731  
732  
733  
734  
735  
736  
737  
738  
739  
740  
741  
742  
743  
744  
745  
746  
747  
748  
749  
750  
751  
752  
753  
754  
755  
756  
757  
758  
759  
760  
761  
762  
763  
764  
765  
766  
767  
768  
769  
770  
771  
772  
773  
774  
775  
776  
777  
778  
779  
780  
781  
782  
783  
784  
785  
786  
787  
788  
789  
790  
791  
792  
793  
794  
795  
796  
797  
798  
799  
800  
801  
802  
803  
804  
805  
806  
807  
808  
809  
810  
811  
812  
813  
814  
815  
816  
817  
818  
819  
820  
821  
822  
823  
824  
825  
826  
827  
828  
829  
830  
831  
832  
833  
834  
835  
836  
837  
838  
839  
840  
841  
842  
843  
844  
845  
846  
847  
848  
849  
850  
851  
852  
853  
854  
855  
856  
857  
858  
859  
860  
861  
862  
863  
864  
865  
866  
867  
868  
869  
870  
871  
872  
873  
874  
875  
876  
877  
878  
879  
880  
881  
882  
883  
884  
885  
886  
887  
888  
889  
890  
891  
892  
893  
894  
895  
896  
897  
898  
899  
900  
901  
902  
903  
904  
905  
906  
907  
908  
909  
910  
911  
912  
913  
914  
915  
916  
917  
918  
919  
920  
921  
922  
923  
924  
925  
926  
927  
928  
929  
930  
931  
932  
933  
934  
935  
936  
937  
938  
939  
940  
941  
942  
943  
944  
945  
946  
947  
948  
949  
950  
951  
952  
953  
954  
955  
956  
957  
958  
959  
960  
961  
962  
963  
964  
965  
966  
967  
968  
969  
970  
971  
972  
973  
974  
975  
976  
977  
978  
979  
980  
981  
982  
983  
984  
985  
986  
987  
988  
989  
990  
991  
992  
993  
994  
995  
996  
997  
998  
999  
1000

1  
2  
3  
4 continuous wave of 2 Hz and current intensity of 0.1 to 1 mA. The current intensity  
5  
6 will be increased until the skin around the acupoints shivers. The manipulation on  
7  
8 BL57, KI3, and BL60 should be performed every 10 minutes; 3 times in 30 minutes.  
9  
10 All needles were removed after 30 minutes and pressure applied using a dry sterilized  
11  
12 cotton ball.  
13  
14



### 18 **MA group**

19  
20 Participants will receive MA at the same points as the EA group, followed by the  
21  
22 same manipulation as EA group until *de qi* is reached. However, there will be no  
23  
24 electric current attached to the needle holders. During needles retaining, the  
25  
26 manipulation on BL57, KI3, and BL60 should be performed every 10 minutes; 3  
27  
28 times in 30 minutes.  
29  
30  
31

32  
33 Both treatment groups will receive 12 sessions of treatment over a 4-week period  
34  
35 after baseline (3 sessions every week). Each session will last for 30 minutes.  
36  
37  
38  
39

### 40 **Rescue medication**

41  
42 Throughout the trial, participants will be discouraged from taking any medication or  
43  
44 other therapy for PF. However, if heel pain is unbearable during the study period,  
45  
46 ibuprofen (sustained release type, 300 mg/T) will be allowed for relief up to 600 mg  
47  
48 per day (2 T/day) for 3 days. Details of drug use (name, time, frequency, and dosage)  
49  
50 will be recorded.  
51  
52  
53  
54  
55  
56

## Outcome measures

### Primary outcome

The primary outcome will be the proportion of responders after the 4-week treatment.

The responder is defined as a participant with a decline (by at least 50%) in the worst pain intensity at first steps in the morning compared with baseline. The pain intensity will be measured using a 100 mm linear visual analog scale (VAS) with 0 representing no pain and 100 the worst imaginable pain. Additionally, the proportion of responders at weeks 16 and 28 will also be assessed.

### Secondary outcomes

The secondary outcomes include the following items:

(1) Change in worst pain intensity measured by VAS at first steps in the morning after 4-week treatment, weeks 16 and 28.

(2) Change in mean pain intensity measured by VAS at first steps in the morning after 4-week treatment, weeks 16 and 28.

(3) Change in worst pain intensity measured by VAS during the day (before bed time) after 4-week treatment, weeks 16 and 28.

(4) Change in mean pain intensity measured by VAS during the day (before bed time) after 4-week treatment, weeks 16 and 28.

(5) Change in the pressure pain threshold (PPT) at the most painful spot after 4-week treatment, weeks 16 and 28. PPT, known as the minimal pressure when the sensation of pressure changes to pain,<sup>26</sup> will be measured by a pressure algometer (Fabrication

1  
2  
3 Enterprises, Inc., White Plains, NY; from 1 kg/cm<sup>2</sup> to 5 kg/cm<sup>2</sup>) consisted of a metal  
4 probe with a rubber disc (0.5 cm<sup>2</sup>) at one end. The pressure applied by pressing the  
5 rubber disc to the painful spot perpendicularly moves the needle in the scale at a rate  
6 of approximately 0.1 kg/cm<sup>2</sup>/s through the metal probe. The mean score of three  
7 repeated measurements at the tested location will be used for the main analysis. Thirty  
8 seconds was used between each trial. Discomfort felt at values below 1 kg/cm<sup>2</sup> are  
9 defined as 0.5 kg/cm<sup>2</sup>.

10  
11  
12  
13  
14  
15  
16  
17  
18  
19  
20 (6) Change in ankle-dorsiflexion range of motion (DFROM) after treatment, weeks 16  
21 and 28: DFROM will be measured for using a digital goniometer (Tangxia Electronic  
22 Instrument Factory, Dongguan, from 0° to 360°). Each participant will be asked to sit  
23 with the popliteal space at the edge of the table and their knees with 90° of flexion in  
24 a completely relaxed station. The axis of the goniometer will be centered over the  
25 lateral malleolus and the arms are aligned with the fibular shaft and the head of the  
26 fifth metatarsal. The examiner passively moves the ankle into dorsiflexion from a  
27 neutral starting position until a firm end feel is elicited.<sup>27</sup> The examiner will measure  
28 the ankle-joint angle 3 times at maximum DFROM within 10 seconds between each  
29 examination.

30  
31  
32  
33  
34  
35  
36  
37  
38  
39  
40 (7) Change in FAAM (Foot and Ankle Ability Measure) total score and subscale  
41 scores after 4-week treatment, weeks 16 and 28: The FAAM is a 29-item evaluative  
42 tool for the function of foot and ankle, which consists of 21-item activities of daily  
43 living (ADL) and 8-item sports subscales.<sup>28</sup> Each item score ranges from 0 to 4, with  
44 higher scores indicating a higher level of function. The FAAM has a maximum  
45  
46  
47  
48  
49  
50  
51  
52  
53  
54  
55  
56  
57  
58  
59  
60

1  
2  
3 potential score (116 total, 84 ADL, and 32 Sport subscales). The obtained score (total  
4 score, ADL, and sport subscale scores) is divided by the maximum potential score and  
5 multiplied by 100 to get a percentage. If the patient cannot respond, it is left blank and  
6 is not a part of the final value of the questionnaire. In this trial, we will use the  
7 Chinese version of FAAM, which has been reported to have a satisfactory  
8 psychometric property.<sup>29</sup>  
9

10  
11  
12  
13  
14  
15  
16  
17  
18 (8) Patients' global improvement assessment: Patients' global improvement will be  
19 assessed by a 7-point self-reporting scale ranging from 1 to 7, where 1 indicates  
20 "complete recovery", 2 indicates "obvious improvement", 3 indicates "a little  
21 improvement", 4 indicates "no change", 5 indicates "a little worse", 6 indicates  
22 "obvious worse", and 7 indicates "vastly worse". The proportions of participants in  
23 each category of global improvement assessment will be measured after the 4-week  
24 treatment, weeks 16 and 28.  
25  
26  
27

28  
29  
30  
31  
32  
33  
34  
35 (9) Patients' expectations for acupuncture: We will assess patients' expectation for  
36 acupuncture at baseline. It includes three brief questions to investigate whether  
37 patients believe that acupuncture treatment will help: "Do you believe acupuncture is  
38 effective for treating the illness?", "Do you think acupuncture will be helpful to  
39 improve your PF?" and "which acupuncture manipulation do you prefer, MA or EA?".  
40 For each question, participants will choose "Yes", "No", or "unclear/whatever" as the  
41 answer.  
42  
43  
44  
45  
46  
47  
48  
49  
50  
51  
52  
53  
54  
55  
56  
57  
58  
59  
60

### **Safety assessment**

All adverse events (AEs) will be monitored and reported through the whole trial. AEs will be categorized as treatment-related (e.g., localized hematoma, localized infection, broken needle, fainting, nausea, dizziness, vomiting, or palpitations) or non-treatment-related within 24 hours after their occurrence. Detailed information on AEs and serious adverse events (SAEs)—including the name, onset and end date, intensity, relationship with acupuncture and outcome—will be recorded. Participants are discontinued if the treatments cause aggravation of symptoms. Researchers will immediately report SAEs (e.g., requiring hospitalization, causing disability or impaired ability to work) to the Medical Ethics Committee of Guang'anmen Hospital and suspend the study.

### **Sample size calculation**

The null hypothesis is that the proportion of participants with at least a 50% decrease from baseline in the worst pain intensity (as measured by the VAS at first steps in the morning after the 4-week treatment) will be same for MA and EA. A decline by at least 50% in the pain at first steps was regarded as clinically relevant.<sup>30</sup> The previous studies reported that 73.3% of the participants had at least a 50% decrease in the pain as measured by the VAS at first steps after the 4-week EA treatment,<sup>31</sup> and 44.4% after the 4-week MA treatment.<sup>32</sup> Power was defined as 80% for an alpha of 5%. Accordingly, 92 participants will be required (46 in each group), assuming a



1  
2  
3 two-tailed test with 10% loss to follow-up.  
4  
5  
6  
7

### 8 **Statistical analysis** 9

10 We will use SPSS v20 software (IBM SPSS Statistics; IBM Corp, Somers, NY) to  
11 perform all statistical analysis following the intention-to-treat (ITT) principle. The  
12 confidence interval will be established at 95%, and the significance level at 0.05.  
13 Missing data will be calculated using the actual observational value without  
14 imputation if the dropout rate is no more than 10%. For continuous data, the data will  
15 be presented as mean  $\pm$  standard deviation when normally distributed or presented as  
16 median (interquartile range) when not normally distributed. The continuous data will  
17 be compared between groups using Student's *t*-test and Wilcoxon rank sum test, and  
18 the categorical data using the Chi-squared test or Fisher's exact test, as appropriate.  
19 Sensitivity analysis will be performed if necessary. A P-value  $<0.05$  will be  
20 considered statistically significant.  
21  
22  
23  
24  
25  
26  
27  
28  
29  
30  
31  
32  
33  
34  
35  
36  
37  
38  
39

### 40 **Quality control** 41

42 Prior to the trial, all staff will undergo special training on the purpose and content of  
43 the trial, treatment strategies, and quality control. Acupuncturists in this trial will have  
44 an acupuncture license with at least 1-year of acupuncture experience. Monitors will  
45 check case report forms once every week as well as the acupuncture operation during  
46 the treatment period. Drop-outs and withdrawals including the reasons will be detailed  
47 documented through the trial. Participants' information will be stored in locked file  
48  
49  
50  
51  
52  
53  
54  
55  
56

1  
2  
3 cabinets at the study sites with limited access; only investigators have the right to  
4  
5 access the data. All investigators will always maintain a strict privacy policy to  
6  
7 protect confidentiality before, during and after the trial.  
8  
9

## 10 11 12 13 **Discussion**

14  
15 The results of this study will clarify the effect of EA compared with MA in treating  
16  
17 PF. There were several trials assessing EA and MA in the treatment of PF.<sup>31 33 34</sup> The  
18  
19 results have already showed that EA or MA coupled with conventional treatments  
20  
21 could reduce pain, disabilities, and activity limitations in patients with PF compared  
22  
23 with conventional treatments.<sup>31 33</sup>  
24  
25  
26

27  
28 According to some previous studies, EA can produce a faster and better analgesic  
29  
30 effect than MA.<sup>19 20</sup> However, no studies have reported the effect of head-to-head  
31  
32 comparison between EA and MA in the treatment of PF. This trial comparing EA  
33  
34 with MA could fill a gap in the literature thus helping physical therapists and  
35  
36 acupuncturists in their clinical decision-making.  
37  
38  
39

40  
41 The VAS is one of the most commonly used instruments for assessment of pain  
42  
43 and has been validated to detect changes in pain intensity.<sup>35</sup> Moreover, it has also  
44  
45 been used in many studies applying acupuncture for PF.<sup>33 34</sup> Because morning pain  
46  
47 localized to the plantar medial aspect of the heel is the distinct feature of PF, we will  
48  
49 choose the proportion of participant with a decline of at least 50% in the worst pain  
50  
51 intensity at first steps in the morning after 4-week treatment compared with baseline  
52  
53 as the primary outcome.  
54  
55  
56

1  
2  
3 The result may help clarify the effect of EA compared with MA on the pain relief  
4 of PF. In addition, considering that pain of PF can be categorized as pressure pain,  
5  
6 PPT (which will be evaluated by an algometer) could be a reasonable objective  
7  
8 secondary outcome to help investigating physiological changes of PF. Moreover,  
9  
10 DFROM measured by a digital goniometer and FAAM are well suited for evaluating  
11  
12 the effects of acupuncture treatment for PF. These would be supportive of the primary  
13  
14 outcome and meaningful for the overall effectiveness evaluation.  
15  
16  
17  
18  
19

20 Strengths of the study include its strictly standardized endpoints and objective  
21  
22 criteria, long-term follow-up, strict quality control, and evaluation of patients'  
23  
24 expectations for acupuncture. The trial also has some limitations. First, this is a  
25  
26 single-center study conducted at a tertiary A hospital in China and the results might  
27  
28 not apply to primary hospital or other countries. Second, participants and the  
29  
30 acupuncturist will not be blinded due to the nature of the study, which might bring  
31  
32 bias and influence the results. Third, considering ethics and the acceptance of  
33  
34 participants, we did not assign a placebo/sham/ wait list group, which could not  
35  
36 exclude the placebo effect of acupuncture and a possible spontaneous remission of the  
37  
38 PF.  
39  
40  
41  
42  
43  
44  
45  
46  
47  
48  
49  
50  
51  
52  
53  
54  
55  
56  
57  
58  
59  
60

1  
2  
3  
4 **Trial status:** No recruitment at the present.

5  
6 **Ethical Approval and Consent to participate** The study protocol has received  
7  
8 approval from the Institutional Review Boards of Guang'anmen Hospital in China  
9  
10 (approval NO. 2018-010-KY, TEL +86-10-88001552), and all investigators will  
11  
12 comply with the Helsinki Declaration.  
13

14  
15 **Consent for publication** Not applicable.

16  
17  
18 **Availability of data and materials** All data are fully available without restriction.

19  
20  
21 **Competing interests** The authors declare that they have no competing interests.  
22

23  
24  
25 **Authors' contributions** Zhishun Liu is responsible for supervising the clinical study  
26  
27 and for communicating important protocol modifications to relevant parties. Weiming  
28  
29 Wang and Zhishun Liu conceived the idea and designed this trial. Ruimin Jiao are  
30  
31 responsible for the recruitment and treatment of patients. Yan Liu and Jie Zhao are  
32  
33 responsible for statistical analysis. This manuscript was drafted by Weiming Wang  
34  
35 and revised by Zhishun Liu. All authors read and approved the final draft of the  
36  
37 manuscript.  
38  
39  
40  
41  
42  
43  
44

45 **Acknowledgments** The authors appreciate the support and efforts from people who  
46  
47 have been or will be included in this study. The authors would like to offer their  
48  
49 sincere thanks to *Medjaden Bioscience Limited* for their editing work.  
50  
51  
52  
53  
54  
55  
56

## References

1. Thompson JV, Saini SS, Reb CW, *et al*. Diagnosis and management of plantar fasciitis. *J Am Osteopath Assoc* 2014;114(12):900-6.
2. Gill LH. Plantar Fasciitis: Diagnosis and Conservative Management. *J Am Acad Orthop Surg* 1997;5(2):109-17.
3. Tong KB, Furia J. Economic burden of plantar fasciitis treatment in the United States. *Am J Orthop (Belle Mead NJ)* 2010;39(5): 227-31.
4. Riddle DL, Pulisic M, Pidcoe P, *et al*. Risk factors for Plantar fasciitis: a matched case-control study. *J Bone Joint Surg Am* 2003;85-A:872-77.
5. S K Neufeld, R Cerrato. Plantar fasciitis: evaluation and treatment. *J Am Acad Orthop Surg* 2008;16 (6):338-46.
6. Healey K, Chen K. Plantar fasciitis: Current diagnostic modalities and treatments. *Clin Podiatr Med Surg* 2010;27 (3): 369-80.
7. Toomey EP. Plantar heel pain. *Foot Ankle Clin* 2009;14 (2):229-45.
8. Cutts S, Obi N, Pasapula C, *et al*. Plantar fasciitis. *Ann R Coll Surg Engl* 2012;94 (8): 539-42.
9. Irving DB, Cook JL, Young MA, *et al*. Impact of chronic plantar heel pain on health-related quality of life. *J Am Podiatr Med Assoc* 2008;98(4):283-89.
10. Johnson RE, Haas K, Lindow K, *et al*. Plantar fasciitis: what is the diagnosis and treatment? *Orthop Nurs* 2014;33(4):198-204

- 1  
2  
3 11. Wolgin M, Cook C, Graham C, *et al.* Conservative treatment of plantar heel pain:  
4  
5 long-term follow-up. *Foot Ankle Int* 1994;15: 97-102.  
6  
7
- 8 12. Petraglia F, Ramazzina I, Costantino C. Plantar fasciitis in athletes: diagnostic and  
9  
10 treatment strategies. A systematic review. *Muscles Ligaments Tendons J*  
11  
12 2017;7(1):107-18.  
13  
14
- 15 13. David JA, Sankarapandian V, Christopher PR, *et al.*  
16  
17 Injected corticosteroids for treating plantar heel pain in adults. *Cochrane Database*  
18  
19 *Syst Rev* 2017 11;6:CD009348.  
20  
21  
22
- 23 14. Thomas JL, Christensen JC, Kravitz SR, *et al.* American College of Foot and  
24  
25 Ankle Surgeons Heel Pain Committee. The diagnosis and treatment of heel pain: a  
26  
27 clinical practice guideline—revision 2010. *J Foot Ankle Surg* 2010;49 (3  
28  
29 suppl):S1-S19. doi:10.1053/j.jfas. 2010.01.001.  
30  
31  
32
- 33 15. Goff JD, Crawford R. Diagnosis and treatment of plantar fasciitis. *Am Fam*  
34  
35 *Physician* 2011, 84: 676-82.  
36  
37
- 38 16. Clark RJ, Tighe M. The effectiveness of acupuncture for plantar heel pain: a  
39  
40 systematic review. *Acupunct Med* 2012;30(4):298-306.  
41  
42
- 43 17. Thiagarajah AG. How effective is acupuncture for reducing pain due to plantar  
44  
45 fasciitis? *Singapore Med J* 2017;58(2):92-7.  
46  
47
- 48 18. Yu Z, Luo L, Li Y, *et al.* Different manual manipulations and electrical parameters  
49  
50 exert different therapeutic effects of acupuncture. *J Tradit Chin*  
51  
52 *Med* 2014;34(6):754-8.  
53  
54
- 55 19. Comachio J, Oliveira Magalhães M, Nogueira Burke T, *et al.* Efficacy of  
56  
57

- 1  
2  
3 acupuncture and electroacupuncture in patients with nonspecific low back pain:  
4  
5 study protocol for a randomized controlled trial. *Trials* 2015;16: 469.  
6  
7  
8  
9 20. Schliessbach J, van der Klift E, Arendt-Nielsen L, *et al.* The effect of brief  
10 electrical and manual acupuncture stimulation on mechanical experimental pain.  
11  
12 *Pain Med* 2011;12(2):268-75.  
13  
14  
15 21. Chan AW, Tetzlaff JM, Gøtzsche PC, *et al.* SPIRIT 2013 explanation and  
16 elaboration: guidance for protocols of clinical trials. *BMJ* 2013; 346: e7586.  
17  
18  
19 22. MacPherson H, Altman DG, Hammerschlag R, *et al.* Revised standards for  
20 reporting interventions in clinical trials of acupuncture (STRICTA): extending the  
21 CONSORT statement. *J Evid Based Med* 2010;3:140-55.  
22  
23  
24 23. Martin RL, Davenport TE, Reischl SF, *et al.* Heel pain–plantar fasciitis: revision  
25 2014. *J Orthop Sports Phys Ther* 2014;44(11): A1-33.  
26  
27  
28 24. Standardization Administration of the People’s Republic of China. GB/  
29 T12346-2006, Nomenclature and Location of Acupuncture Points [S].2006.  
30  
31  
32 25. Zhou K, Fang J, Wang X, *et al.* Characterization of de qi with electroacupuncture  
33 at acupoints with different properties. *J Altern Complement Med* 2011; 17:  
34 1007-13.  
35  
36  
37 26. Vanderweeen L, Oostendorp RA, Vaes P, *et al.* Pressure algometry in manual  
38 therapy. *Man Ther* 1996;1(5):258-65.  
39  
40  
41 27. Fong CM, Blackburn JT, Norcross MF, *et al.* Ankle-Dorsiflexion Range of  
42 Motion and Landing Biomechanics. *J Athl Train* 2011;46(1):5-10  
43  
44  
45  
46  
47  
48  
49  
50  
51  
52  
53  
54  
55  
56  
57  
58  
59  
60

- 1  
2  
3  
4 28. Martin R. Foot and Ankle Ability Measure (FAAM).  
5  
6 <http://www.healthsciences.duq.edu/pdf/FAAM12-051.pdf>. Accessed March 23,  
7  
8 2018.  
9
- 10  
11 29. González-Sánchez M, Li GZ, Ruiz Muñoz, *et al*. Foot and ankle ability measure  
12  
13 to measure functional limitations in patients with foot and ankle disorders: a  
14  
15 Chinese cross-cultural adaptation and validation. *Disabil Rehabil* 2017,39(21),  
16  
17 2182-9.  
18  
19
- 20  
21 30. Farrar JT, Young JP Jr, LaMoreaux L, *et al*. Clinical importance of changes in  
22  
23 chronic pain intensity measured on an 11-point numerical pain rating scale. *Pain*  
24  
25 2001,94(2):149-158.  
26  
27
- 28 31. Kumnerdee W, Pattapong N. Efficacy of Electro-Acupuncture in Chronic Plantar  
29  
30 Fasciitis: A Randomized Controlled Trial. *Am J Chin Med* 2012;40(6):1167-76.  
31  
32
- 33 32. Tillu A, Gupta S. Effect of Acupuncture Treatment on Heel Pain due to Plantar  
34  
35 Fasciitis. *Acupunct Med* 1998;16:66-8.  
36  
37
- 38 33. Zhang SP, Yip TP, Li QS. Acupuncture treatment for plantar fasciitis: a  
39  
40 randomized controlled trial with six months follow-up. *Evid Based Complement*  
41  
42 *Alternat Med* 2011; 2011: 154108.  
43  
44
- 45 34. Karagounis P, Tsironi M, Prionas G, *et al*. Treatment of plantar fasciitis in  
46  
47 recreational athletes: two different therapeutic protocols. *Foot Ankle Spec* 2011;  
48  
49 4:226-34.  
50  
51  
52  
53  
54  
55  
56  
57  
58  
59  
60



- 1  
2  
3 35. Vixner L, Schytt E, Stener-Victorin E, *et al.* Acupuncture with manual and  
4  
5  
6 electrical stimulation for labour pain: a longitudinal randomised controlled trial.  
7  
8 *BMC Complement Altern Med* 2014; 9;14: 187.  
9  
10  
11  
12  
13  
14  
15  
16  
17  
18  
19  
20  
21  
22  
23  
24  
25  
26  
27  
28  
29  
30  
31  
32  
33  
34  
35  
36  
37  
38  
39  
40  
41  
42  
43  
44  
45  
46  
47  
48  
49  
50  
51  
52  
53  
54  
55  
56  
57  
58  
59  
60

For peer review only

1  
2  
3  
4  
5  
6  
7  
8  
9  
10  
11  
12  
13  
14  
15  
16  
17  
18  
19  
20  
21  
22  
23  
24  
25  
26  
27  
28  
29  
30  
31  
32  
33  
34  
35  
36  
37  
38  
39  
40  
41  
42  
43  
44  
45  
46  
47  
48  
49  
50  
51  
52  
53  
54  
55  
56  
57  
58  
59  
60

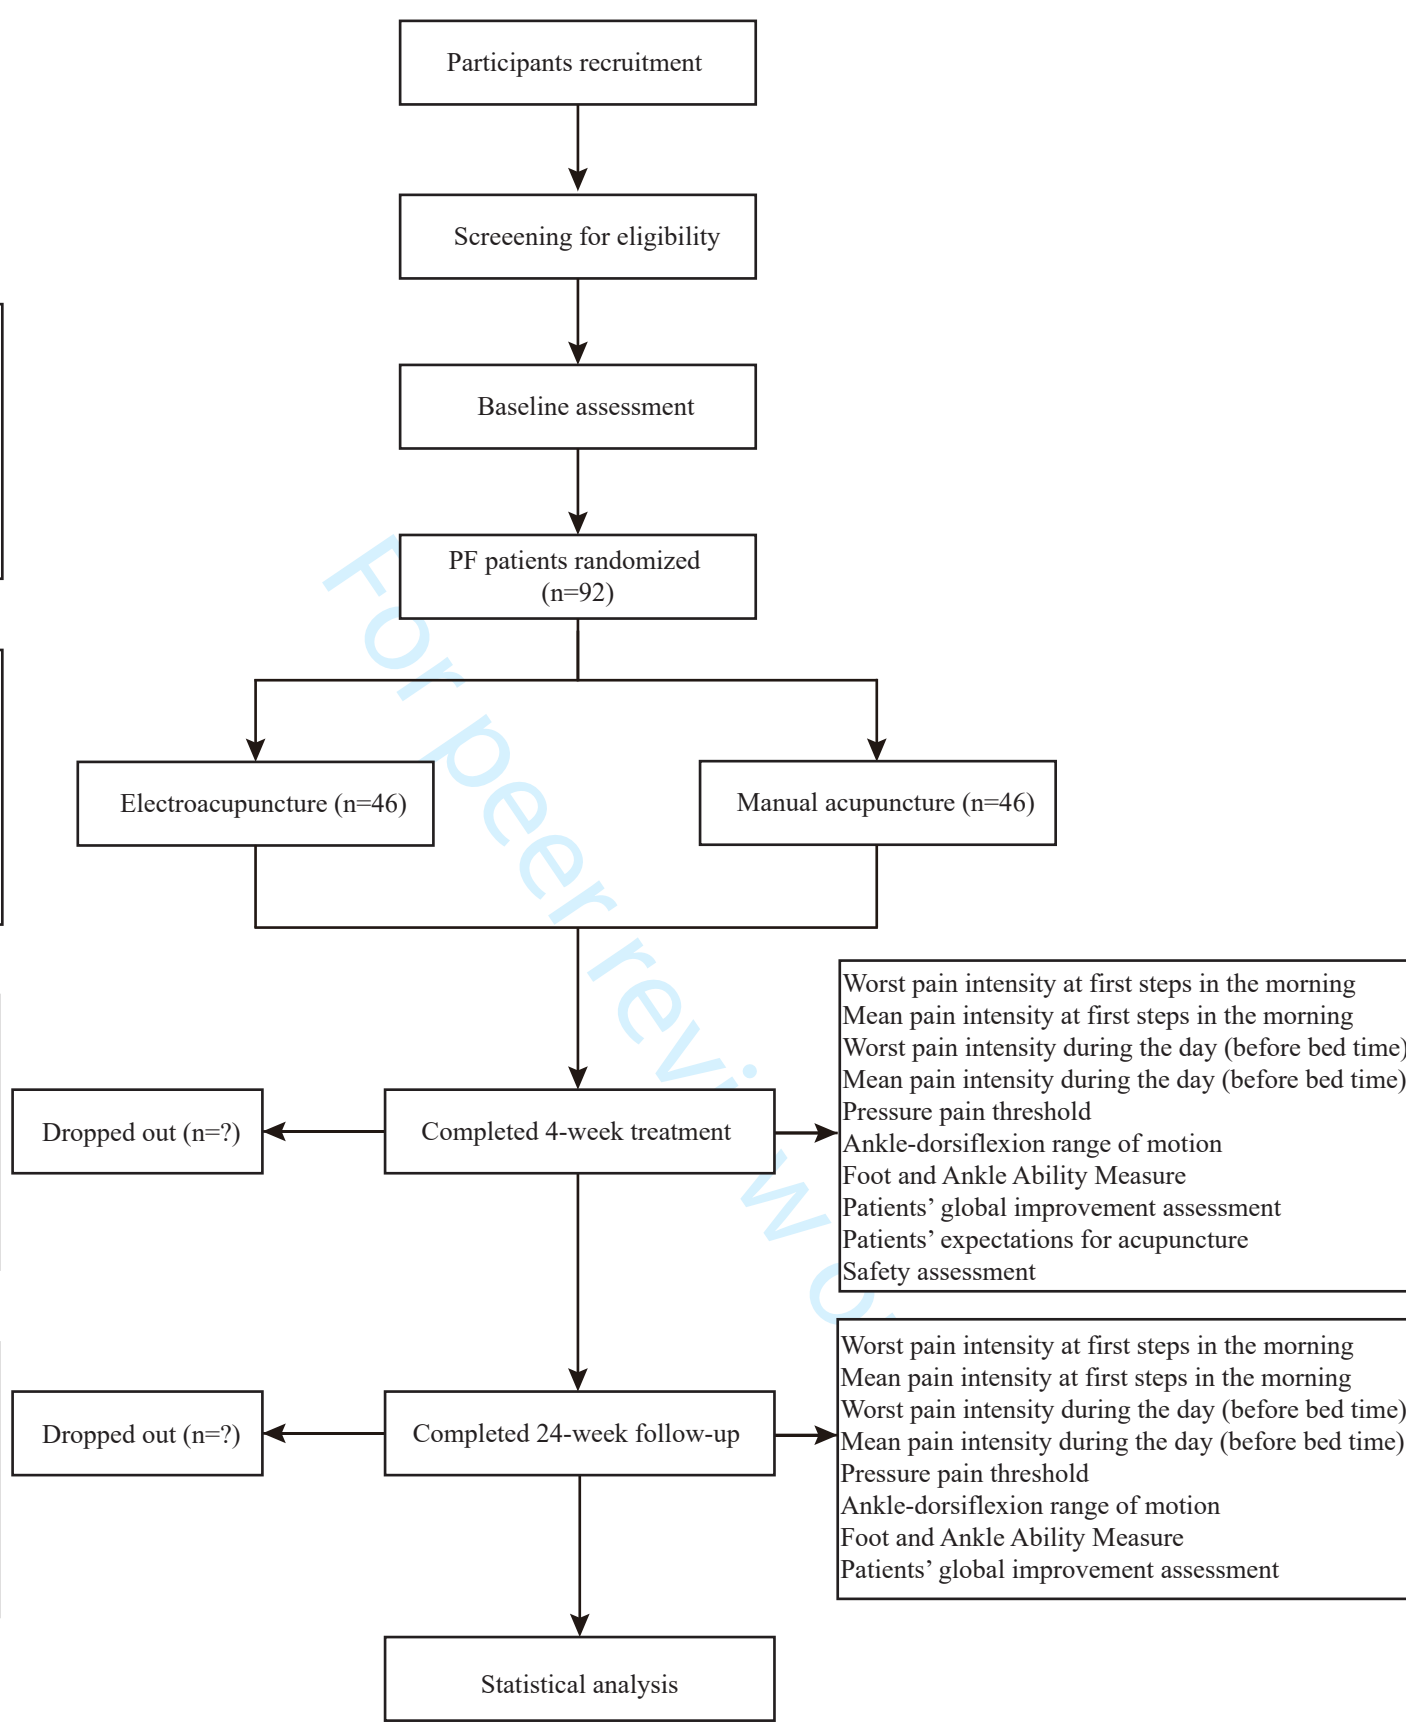

Figure 1. Trial flow diagram

| TIME POINT (W, week)                                  | Study Period |            |              |           |         |
|-------------------------------------------------------|--------------|------------|--------------|-----------|---------|
|                                                       | Baseline     | Allocation | Treatment    | Follow-up |         |
|                                                       |              |            | W 4±2d       | W 16±3d   | W 24±3d |
| <b>Enrollment</b>                                     |              |            |              |           |         |
| Eligibility criteria                                  | ×            |            |              |           |         |
| Demography characteristics                            | ×            |            |              |           |         |
| Disease history of PF                                 | ×            |            |              |           |         |
| Eligibility screen                                    | ×            |            |              |           |         |
| Informed consent                                      | ×            |            |              |           |         |
| Allocation                                            |              | ×          |              |           |         |
| <b>Interventions</b>                                  |              |            |              |           |         |
| Electroacupuncture                                    |              |            | ×(weeks 1-4) |           |         |
| Manual acupuncture                                    |              |            | ×(weeks 1-4) |           |         |
| <b>Assessments</b>                                    |              |            |              |           |         |
| Worst pain intensity at first steps in the morning    | ×            |            | ×            | ×         | ×       |
| Mean pain intensity at first steps in the morning     | ×            |            | ×            | ×         | ×       |
| Worst pain intensity during the day (before bed time) | ×            |            | ×            | ×         | ×       |
| Mean pain intensity during the day (before bed time)  | ×            |            | ×            | ×         | ×       |
| Pressure pain threshold                               | ×            |            | ×            | ×         | ×       |
| Ankle-dorsiflexion range of motion                    | ×            |            | ×            | ×         | ×       |
| Foot and Ankle Ability Measure                        | ×            |            | ×            | ×         | ×       |
| Patients' global improvement assessment               | ×            |            | ×            | ×         | ×       |
| Patients' expectations for acupuncture                | ×            |            |              |           |         |
| Adverse events                                        |              |            | ×            |           |         |
| Safety assessment                                     |              |            | ×            | ×         | ×       |

Figure 2: The time point of assessment

# BMJ Open

## Electroacupuncture versus manual acupuncture in the treatment of plantar heel pain syndrome: study protocol for an upcoming randomized controlled trial

|                                 |                                                                                                                                                                                                                                                                                                                                                                                                                                                                                   |
|---------------------------------|-----------------------------------------------------------------------------------------------------------------------------------------------------------------------------------------------------------------------------------------------------------------------------------------------------------------------------------------------------------------------------------------------------------------------------------------------------------------------------------|
| Journal:                        | <i>BMJ Open</i>                                                                                                                                                                                                                                                                                                                                                                                                                                                                   |
| Manuscript ID                   | bmjopen-2018-026147.R1                                                                                                                                                                                                                                                                                                                                                                                                                                                            |
| Article Type:                   | Protocol                                                                                                                                                                                                                                                                                                                                                                                                                                                                          |
| Date Submitted by the Author:   | 07-Jan-2019                                                                                                                                                                                                                                                                                                                                                                                                                                                                       |
| Complete List of Authors:       | WANG, Weiming; Guang'anmen Hospital, China Academy of Chinese Medical Sciences, Department of acupuncture<br>Liu, Yan<br>Zhao, Jie; Guang'anmen Hospital, China Academy of Chinese Medical Sciences, Department of acupuncture<br>Jiao, Ruimin; Guang'anmen Hospital, China Academy of Chinese Medical Sciences, Department of acupuncture<br>Liu, zhishun; Guang'an men Hospital Affiliated to China Academy of Chinese Medical Sciences, acupuncture and moxibustion department |
| <b>Primary Subject Heading</b>: | Complementary medicine                                                                                                                                                                                                                                                                                                                                                                                                                                                            |
| Secondary Subject Heading:      | Evidence based practice                                                                                                                                                                                                                                                                                                                                                                                                                                                           |
| Keywords:                       | acupuncture, randomized controlled trial, plantar heel pain syndrome, protocol                                                                                                                                                                                                                                                                                                                                                                                                    |
|                                 |                                                                                                                                                                                                                                                                                                                                                                                                                                                                                   |

SCHOLARONE™  
Manuscripts

1  
2  
3 1 Title page  
4

5 2

6 3 Article title:  
7  
8  
9

10 4 **Electroacupuncture versus manual acupuncture in the treatment of**  
11  
12 5 **plantar heel pain syndrome: study protocol for an upcoming**  
13  
14 6 **randomized controlled trial**  
15  
16

17 7

18 8

19  
20  
21 9 Weiming Wang,<sup>1</sup> Yan Liu,<sup>2</sup> Jie Zhao,<sup>1</sup> Ruimin Jiao,<sup>1</sup> Zhishun Liu<sup>1\*</sup>  
22

23 10

24  
25 11 <sup>1</sup>Department of Acupuncture, Guang'anmen Hospital, China Academy of Chinese  
26 12 Medical Sciences, Beijing, China

27  
28 13 <sup>2</sup> Institute of Basic Research in Clinical Medicine, China Academy of Chinese  
29 14 Medical Sciences, Beijing, China  
30  
31

32 15

33  
34 16 Corresponding author: Department of Acupuncture and Moxibustion, Guang'an Men  
35 17 Hospital, China Academy of Chinese Medical Sciences, No.5 Beixiang St., Xicheng  
36 18 District, Beijing, China, Email: zhishunjournal@163.com.  
37  
38  
39

40 19

41  
42 20 **Word count: abstract:310; main text:3615**  
43  
44

45 21

46 22 **Funding** This RCT is funded by Guang'anmen Hospital, China Academy of Chinese  
47 23 Medical Sciences, China (Grant No. 2017S393).  
48  
49  
50  
51  
52  
53  
54  
55  
56  
57  
58  
59  
60

1  
2  
3  
4 **24 Abstract**

5  
6 **25 Introduction:** Plantar heel pain syndrome is a common cause of heel pain. It may  
7  
8  
9  
10  
11  
12  
13  
14  
15  
16  
17  
18  
19  
20  
21  
22  
23  
24  
25  
26  
27  
28  
29  
30  
31  
32  
33  
34  
35  
36  
37  
38  
39  
40  
41  
42  
43  
44  
45  
46  
47  
48  
49  
50  
51  
52  
53  
54  
55  
56  
57  
58  
59  
60  
worsen a patient's quality of life, and potentially lead to knee, hip, or lower back  
problems. Previous studies have shown that electroacupuncture and manual  
acupuncture are effective treatments for relieving pain in patients with Plantar heel  
pain syndrome. However, little evidence supports the use of one intervention over the  
other.

**31 Methods and analysis:** A total of 92 patients diagnosed with plantar heel pain  
32  
33  
34  
35  
36  
37  
38  
39  
40  
41  
42  
43  
44  
45  
46  
47  
48  
49  
50  
51  
52  
53  
54  
55  
56  
57  
58  
59  
60  
syndrome will be recruited and randomly assigned to an electroacupuncture group or  
a manual acupuncture group at a ratio of 1:1. Patients in both groups will receive a  
30-min acupuncture treatment (3 times per week) for a total of 12 sessions over 4  
weeks. The primary outcome will be the proportion of patients with at least 50%  
reduction from baseline in the worst pain intensity measured by visual analog scale (0  
to 100, higher scores signify worse pain) at first steps in the morning after 4-week  
treatment. The secondary outcomes will include change in worst pain intensity at first  
steps in the morning, change in mean pain intensity at first steps in the morning,  
change in worst pain intensity during the day, change in mean pain intensity during  
the day, change in the pressure pain threshold, change in ankle-dorsiflexion range of  
motion, change in Foot and Ankle Ability Measure total score and subscale scores,  
patients' global improvement assessment, patients' expectations for acupuncture, and  
safety evaluation. We will perform all statistical analysis following the  
intention-to-treat principle.

1  
2  
3  
4 46 **Ethics and dissemination:** The study has been approved by our ethics review board  
5  
6 47 (Protocol Approval No. 2018-010-KY). The study findings will be disseminated  
7  
8  
9 48 through presentation at a high-impact medical journal, with online access. We also to  
10  
11  
12 49 plan to present it in select conferences and scientific meetings.

13  
14 50 **Trial registration:** Chinese Clinical Trial Registry identifier: ChiCTR-1800016531,  
15  
16  
17 51 registered 7 June 2018.

18  
19  
20 52 **Strengths and limitations of this study:**

21  
22 53 ► This study is the first randomized controlled trial comparing electroacupuncture  
23  
24  
25 54 versus manual acupuncture for pain relief in participants with plantar heel pain  
26  
27  
28 55 syndrome.

29  
30 56 ► Strictly standardized endpoints and objective criteria, long-term follow-up, strict  
31  
32  
33 57 quality control, and evaluation of patients' expectations for acupuncture aiming to  
34  
35  
36 58 reduce the risk of bias.

37  
38 59 ► Eligible participants will be restricted to those in a tertiary A hospital in China, the  
39  
40  
41 60 results might not apply to primary hospital or other countries.

42  
43 61 ► Due to the nature of the study, participants and the acupuncturist will not be  
44  
45  
46 62 blinded, which may bring bias and influence the results.

47  
48 63 ► Considering ethics and the acceptance of participants, a placebo/sham/ wait list  
49  
50  
51 64 group will not be assigned, which could not exclude the placebo effect of acupuncture  
52  
53  
54 65 and a possible spontaneous remission of the plantar heel pain syndrome.

## 66 **Background**

67 Plantar heel pain syndrome (PHPS), also referred to as plantar fasciitis, is a common  
68 cause of heel pain,<sup>1 2</sup> It is characterized by pain exacerbated with the first walking in  
69 the morning or after a long period of rest.<sup>3</sup> In the United States, more than 2 million  
70 people per year seek treatment due to heel pain,<sup>4</sup> and approximately 10% of the  
71 general population is affected by heel pain during their lives.<sup>5</sup> Excluding conditions  
72 such as fat pad atrophy, plantar fibromatosis, and calcaneal stress fracture, symptoms  
73 of plantar heel pain are attributed to PHPS in 80% of patients.<sup>6</sup> Patients ranging in age  
74 from 40 to 60 years comprise the largest affected 20-year age group.<sup>7</sup> PHPS usually  
75 occurs unilaterally with bilateral involvement occurring only 30% of the time .<sup>8</sup>  
76 Common risk factors known to be associated with PHPS include obesity, decreased  
77 ankle dorsiflexion or shortened/tight achilles tendon, excessive running, pes cavus  
78 (high arched foot type), and pes planus (flat foot).<sup>6 7 9</sup> PHPS may worsen a patient's  
79 quality of life,<sup>10</sup> and potentially lead to knee, hip, or lower back problems.

80 PHPS likely has multiple etiologies in combination with degeneration and  
81 inflammation.<sup>11</sup> The healing time of PHPS generally varies from 6 to 18 months,  
82 although it is a self-limiting condition.<sup>8 12</sup> Different approaches are available for the  
83 treatment of PHPS, including instrumental-, physical-, drug-, and surgical-therapy.<sup>1</sup>  
84 However, definite effects of instrumental- and physical-therapy are still needed to be  
85 confirmed. Meanwhile, drug-therapy (e.g., oral analgesics and corticosteroid  
86 injections) do not provide sustained pain relief effect,<sup>13</sup> and corticosteroid injections  
87 may be associated with plantar fascia rupture and plantar fat pad atrophy.<sup>11</sup> Surgical



1  
2  
3  
4 88 -therapy is indicated only after at least 6 to 12 months of conservative treatment has

5  
6  
7 89 failed.<sup>14</sup> Moreover, some patients are resistant to surgery because of fear or cost.

8  
9 90 There is little convincing evidence available to support various approaches for

10  
11  
12 91 treating PHPS.<sup>15</sup>

13  
14 92 Even lack of unified standard on the definition of acupuncture, most hold the view

15  
16  
17 93 that acupuncture is a technique of the stimulation of specific points on the skin by the

18  
19  
20 94 insertion of needles based on the principles of traditional Chinese medicine.<sup>16</sup>

21  
22 95 Acupuncture has been used to treat a variety of musculoskeletal pain-related

23  
24  
25 96 conditions (including PHPS) for thousands of years. Acupuncturists'

26  
27 97 conceptualisations of PHPS include 'deficient Kidney Qi', 'Bi syndrome' and

28  
29  
30 98 others.<sup>17</sup> At present, various acupuncture modality such as electroacupuncture and

31  
32  
33 99 manual acupuncture are available to clinicians. Stimulation of acupuncture points

34  
35 100 through needling was shown to inducing analgesia via releasing neuropeptides such as

36  
37  
38 101 enkephalin, dynorphin,  $\beta$ -endorphin and endomorphine.<sup>18</sup> Two recent systematic

39  
40 102 reviews concerning the effectiveness of acupuncture in treating PHPS have concluded

41  
42  
43 103 that acupuncture may reduce PHPS pain in the short term and acupuncture should be

44  
45  
46 104 included in recommendations for the treatment of PHPS<sup>19,20</sup>. Though broader

47  
48 105 questions such as how practitioners choose between the various approaches in

49  
50  
51 106 different contexts remain unclear,<sup>17</sup> future research should have a focus on exploring

52  
53  
54 107 the optimum use of acupuncture for heel pain.<sup>20</sup>

55  
56 108 EA and MA are the two acupuncture modalities frequently used which may exert

57  
58  
59 109 different therapeutic effects via different mechanisms related to the characteristics of

1  
2  
3  
4 110 diseases.<sup>21</sup> EA has been indicated in some cases where treatment with traditional  
5  
6 111 acupuncture has failed. Moreover, it has been demonstrated to produce a faster and  
7  
8  
9 112 better analgesic effect than MA.<sup>22 23</sup>  
10

11  
12 113 To our knowledge, until now no randomized controlled clinical research has  
13  
14 114 compared the effectiveness of EA with MA in treating PHPS. The objective of this  
15  
16  
17 115 study is to assess whether EA was superior to MA in reducing PHPS pain.  
18

## 19 20 117 **Methods and design**

### 21 22 118 **Study design**

23  
24 119 We will conduct a prospective randomized parallel-group assessor-blinded two-arm  
25  
26  
27 120 trial. The standard protocol items including Recommendations for Interventional  
28  
29 121 Trials (SPIRIT)<sup>24</sup> and the Standards for Reporting Interventions in Clinical Trials of  
30  
31 122 Acupuncture (STRICTA)<sup>25</sup> guidelines will be followed during the development of  
32  
33  
34 123 the protocol of this study. The flow chart is shown in Fig. 1 and the time point of  
35  
36 124 assessment is shown in Fig. 2.  
37

### 38 39 125 40 41 126 **Study setting and recruitment**

42  
43 127 This trial will be performed at Guang'anmen Hospital, China Academy of Chinese  
44  
45 128 Medical Sciences between October 2018 and December 2019. A total of 92  
46  
47  
48 129 participants will be recruited through posters, hospital webs, and networks. The  
49  
50 130 duration of the study for each participant will be 29 weeks: 1-week baseline, 4-week  
51  
52 131 treatment, and 24-week follow-up.  
53

### 54 55 132 56 57 58 133 **Randomization and blinding** 59 60

1  
2  
3  
4 134 A 1-week baseline assessment will be needed before randomization. Participants will  
5  
6 135 be randomly assigned to either the EA or MA group at a ratio of 1:1. To ensure equal  
7  
8  
9 136 distribution in treatment groups, the random block is set to a fixed size of 4. The  
10  
11 137 randomizing scheme will be generated using the Statistics Analysis System (SAS)  
12  
13  
14 138 software created by the Clinical Pharmacological Assessment Center at Guang'anmen  
15  
16  
17 139 Hospital. Random numbers and assigned groups were signed and sealed in an opaque  
18  
19  
20 140 envelope by the staff who produced it and kept by other staff who took no part in this  
21  
22 141 trial. Research assistants who did not participant in the assessment and treatment will  
23  
24  
25 142 open the envelopes according to the sequence numbers. The research assistants will  
26  
27  
28 143 be in charge of recruitment and data collection, and an orthopedist will be in charge of  
29  
30 144 the diagnosis of the participants. Participants and the acupuncturist will not be blinded  
31  
32  
33 145 to the allocation. The efficacy evaluator will be blinded.  
34  
35  
36 146

## 147 **Participants**

### 148 **Inclusion criteria:**

149 Participants aged from 18 to 75 years will be included in the study if they meet the  
150 diagnostic criteria for PHPS according to the Orthopaedic Section of American  
151 Physical Therapy Association,<sup>26</sup> and conform to all the following conditions for at  
152 least 1 month:  
153 (1) Pain localized to the plantar medial aspect of the heel along the insertion of the  
154 plantar fascia;  
155 (2) Most noticeable plantar medial heel pain with initial steps after a period of

- 1  
2  
3  
4 156 inactivity (e.g., initial steps in the morning) but also worse following prolonged  
5  
6  
7 157 weight bearing;  
8  
9 158 (3) Palpation/provocation over the medial calcaneal tuberosity or along the plantar  
10  
11  
12 159 fascia;  
13  
14 160 (4) Active and passive talocrural dorsiflexion range of motion;  
15  
16  
17 161 (5) Positive windlass test as well as negative tarsal tunnel tests;  
18  
19  
20 162 (6) A minimum score of 40 in worst pain intensity at first steps in the morning  
21  
22 163 according to the 100-point visual analog scale (VAS); and  
23  
24  
25 164 (7) Signed the informed consent prior to inclusion.  
26  
27  
28  
29

30 166 **Exclusion criteria:**

- 31  
32 167 Participants who fulfill any of the following criteria will be excluded:  
33  
34  
35 168 (1) A history of ankle and foot fracture, surgery or tumor, or have a foot deformity;  
36  
37  
38 169 (2) A history of plantar fascia rupture, nerve entrapment syndrome, or achilles tendon  
39  
40 170 lesions;  
41  
42  
43 171 (3) Neurological or systemic diseases including rheumatoid arthritis, diabetes,  
44  
45 172 cardiovascular disorder, severe hepatic/renal insufficiency, or coagulation disorder;  
46  
47  
48 173 (4) Existing systemic or local infection, or chapped heel skin;  
49  
50  
51 174 (5) Used local corticosteroid injections in the last 6 months;  
52  
53 175 (6) Needle-phobic patients or had received EA or MA in the past 4 weeks.  
54  
55

56 176

57  
58 177 **Intervention and comparison**  
59  
60

1  
2  
3  
4 178 The intervention protocol of this trial is based on the meridian theory of traditional  
5  
6 179 Chinese medicine and the consensus of three acupuncture specialists, it is also used in  
7  
8  
9 180 a systematic review.<sup>19</sup> Acupuncturists who hold an acupuncture license and have at  
10  
11 181 least 1-year of experience in acupuncture will perform the treatment. Disposable  
12  
13  
14 182 acupuncture needle (size 0.30×40 mm) and SDZ-V EA apparatus (all Hwato Brand,  
15  
16  
17 183 Suzhou Medical Appliance Factory, Suzhou, China) will be used in this trial.  
18  
19 184 Acupuncture will be given on the heel pain side. If a subject experienced PHPS on  
20  
21  
22 185 both sides, the treatment will be performed on both sides with the more serious side  
23  
24  
25 186 evaluated.

26  
27 187

### 28 29 30 188 **EA group**

31  
32 189 Two Ashi points (the severer tender points over the anteromedial aspect of the heels),  
33  
34 190 Chengshan (BL57), Taixi (KI3) and Kunlun (BL60) will be selected in this trial.  
35  
36  
37 191 Based on the principles of TCM, the major cause of PHPS is qi and blood deficiency  
38  
39 192 in the kidney meridian. Sometimes PHPS may also associated with qi and blood  
40  
41  
42 193 stasis.<sup>27</sup> Whatever the root cause, stimulation of Ashi points can unblock the qi-blood  
43  
44  
45 194 stagnation and result in alleviating pain.<sup>28</sup> BL57, KI3 and BL60 will be selected to  
46  
47  
48 195 build and supply qi and blood to the local area and kidney as well as to the whole  
49  
50  
51 196 person. The location of the acupoints will be based on *Nomenclature and location of*  
52  
53 197 *acupuncture points*<sup>29</sup> drafted in 2006 by the National Standard of the People's  
54  
55  
56 198 Republic of China (GB/T 12346–2006). After the local skin was routinely sterilized in  
57  
58  
59 199 a prone position, the participants' Ashi points will be vertically inserted by the  
60

1  
2  
3  
4 200 needles to a depth of 10 to 15 mm to the plantar fascia layer. For BL57, KI3, and  
5  
6 201 BL60, needles will be vertically inserted approximately 15 mm. All needles other than  
7  
8  
9 202 Ashi points will be gently stimulated by lifting and thrusting combined with twirling  
10  
11 203 and rotating the needle to reach *de qi* (the sensation of sourness, numbness, swelling  
12  
13 204 and heaviness).<sup>30</sup> Paired alligator clips of the EA apparatus will be attached to the  
14  
15 205 needle holders of the two Ashi points. EA stimulation will last for 30 minutes with a  
16  
17 206 continuous wave of 2 Hz and current intensity of 0.1 to 1 mA. The current intensity  
18  
19 207 will be increased until the skin around the acupoints shivers. The manipulation on  
20  
21 208 BL57, KI3, and BL60 should be performed every 10 minutes; 3 times in 30 minutes.  
22  
23 209 All needles were removed after 30 minutes and pressure applied using a dry sterilized  
24  
25 210 cotton ball.  
26  
27  
28  
29  
30  
31  
32  
33  
34

### 35 212 **MA group**

36  
37 213 Participants will receive MA at the same points as the EA group, followed by the  
38  
39 214 same manipulation as EA group until *de qi* is reached. However, there will be no  
40  
41 215 electric current attached to the needle holders. During needles retaining, the  
42  
43 216 manipulation on BL57, KI3, and BL60 should be performed every 10 minutes; 3  
44  
45 217 times in 30 minutes.  
46  
47  
48  
49

50 218 Both treatment groups will receive 12 sessions of treatment over a 4-week period  
51  
52 219 after baseline (3 sessions every week). Each session will last for 30 minutes.  
53  
54  
55

56 220

### 57 221 **Rescue medication**

1  
2  
3  
4 222 Throughout the trial, participants will be discouraged from taking any medication or  
5  
6 223 other therapy for PHPS. However, if heel pain is unbearable during the study period,  
7  
8  
9 224 ibuprofen (sustained release type, 300 mg/T) will be allowed for relief up to 600 mg  
10  
11 225 per day (2 T/day) for 3 days. Details of drug use (name, time, frequency, and dosage)  
12  
13  
14 226 will be recorded.

15  
16  
17 227

## 18 19 228 **Outcome measures**

### 20 21 229 **Primary outcome**

22  
23 230 The primary outcome will be the proportion of responders after the 4-week treatment.

24  
25 231 The responder is defined as a participant with a decline (by at least 50%) in the worst  
26  
27 232 pain intensity at first steps in the morning compared with baseline. The pain intensity  
28  
29 233 will be measured using a 100 mm linear VAS with 0 representing no pain and 100 the  
30  
31 234 worst imaginable pain. Additionally, the proportion of responders at weeks 16 and 28  
32  
33 235 will also be assessed.

### 34 35 236 **Secondary outcomes**

36  
37 237 The secondary outcomes include the following items:

38  
39 238 (1) Change in worst pain intensity measured by VAS at first steps in the morning after  
40  
41 239 4-week treatment, weeks 16 and 28.

42  
43 240 (2) Change in mean pain intensity measured by VAS at first steps in the morning after  
44  
45 241 4-week treatment, weeks 16 and 28.

46  
47 242 (3) Change in worst pain intensity measured by VAS during the day (before bed time)  
48  
49 243 after 4-week treatment, weeks 16 and 28.

1  
2  
3  
4 244 (4) Change in mean pain intensity measured by VAS during the day (before bed time)

5  
6 245 after 4-week treatment, weeks 16 and 28.

7  
8  
9 246 (5) Change in the pressure pain threshold (PPT) at the most painful spot after 4-week

10  
11 247 treatment, weeks 16 and 28. PPT, known as the minimal pressure when the sensation

12  
13 248 of pressure changes to pain,<sup>31</sup> will be measured by a pressure algometer (Fabrication

14  
15 249 Enterprises, Inc., White Plains, NY; from 1 kg/cm<sup>2</sup> to 5 kg/cm<sup>2</sup>) consisted of a metal

16  
17 250 probe with a rubber disc (0.5 cm<sup>2</sup>) at one end. The pressure applied by pressing the

18  
19 251 rubber disc to the painful spot perpendicularly moves the needle in the scale at a rate

20  
21 252 of approximately 0.1 kg/cm<sup>2</sup>/s through the metal probe. The mean score of three

22  
23 253 repeated measurements at the tested location will be used for the main analysis. Thirty

24  
25 254 seconds will be used between each trial. Discomfort felt at values below 1 kg/cm<sup>2</sup> are

26  
27 255 defined as 0.5 kg/cm<sup>2</sup>.

28  
29 256 (6) Change in ankle-dorsiflexion range of motion (DFROM) after treatment, weeks 16

30  
31 257 and 28: DFROM will be measured for using a digital goniometer (Tangxia Electronic

32  
33 258 Instrument Factory, Dongguan, from 0° to 360°). Each participant will be asked to sit

34  
35 259 with the popliteal space at the edge of the table and their knees with 90° of flexion in

36  
37 260 a completely relaxed station. The axis of the goniometer will be centered over the

38  
39 261 lateral malleolus and the arms are aligned with the fibular shaft and the head of the

40  
41 262 fifth metatarsal. The examiner passively moves the ankle into dorsiflexion from a

42  
43 263 neutral starting position until a firm end feel is elicited.<sup>32</sup> The examiner will measure

44  
45 264 the ankle-joint angle 3 times at maximum DFROM within 10 seconds between each

46  
47 265 examination.



1  
2  
3  
4 266 (7) Change in FAAM (Foot and Ankle Ability Measure) total score and subscale  
5  
6 267 scores after 4-week treatment, weeks 16 and 28: The FAAM is a 29-item evaluative  
7  
8  
9 268 tool for the function of foot and ankle, which consists of 21-item activities of daily  
10  
11 269 living (ADL) and 8-item sports subscales.<sup>33</sup> Each item score ranges from 0 to 4, with  
12  
13  
14 270 higher scores indicating a higher level of function. The FAAM has a maximum  
15  
16 271 potential score (116 total, 84 ADL, and 32 Sport subscales). The obtained score (total  
17  
18 272 score, ADL, and sport subscale scores) is divided by the maximum potential score and  
19  
20 273 multiplied by 100 to get a percentage. If the patient cannot respond, it is left blank and  
21  
22 274 is not a part of the final value of the questionnaire. In this trial, we will use the  
23  
24 275 Chinese version of FAAM, which has been reported to have a satisfactory  
25  
26 276 psychometric property.<sup>34</sup>

27  
28  
29  
30  
31  
32 277 (8) Patients' global improvement assessment: Patients' global improvement will be  
33  
34 278 assessed by a 7-point self-reporting scale ranging from 1 to 7, where 1 indicates  
35  
36 279 "complete recovery", 2 indicates "obvious improvement", 3 indicates "a little  
37  
38 280 improvement", 4 indicates "no change", 5 indicates "a little worse", 6 indicates  
39  
40 281 "obvious worse", and 7 indicates "vastly worse". The proportions of participants in  
41  
42 282 each category of global improvement assessment will be measured after the 4-week  
43  
44 283 treatment, weeks 16 and 28.

45  
46  
47  
48 284 (9) Patients' expectations for acupuncture: We will assess patients' expectation for  
49  
50 285 acupuncture at baseline. It includes three brief questions to investigate whether  
51  
52 286 patients believe that acupuncture treatment will help: "Do you believe acupuncture is  
53  
54 287 effective for treating the illness?", "Do you think acupuncture will be helpful to  
55  
56  
57  
58  
59  
60

1  
2  
3  
4 288 improve your PHPS?” and “which acupuncture manipulation do you prefer, MA or  
5  
6 289 EA?”. For each question, participants will choose “Yes”, “No”, or “unclear/whatever”  
7  
8  
9 290 as the answer.  
10

11 291

### 12 292 **Safety assessment**

13  
14  
15 293 All adverse events (AEs) will be monitored and reported through the whole trial. AEs  
16  
17 294 will be categorized as treatment-related (e.g., localized hematoma, localized infection,  
18  
19 295 broken needle, fainting, nausea, dizziness, vomiting, or palpitations) or  
20  
21 296 non-treatment-related within 24 hours after their occurrence. Detailed information on  
22  
23 297 AEs and serious adverse events (SAEs)—including the name, onset and end date,  
24  
25 298 intensity, relationship with acupuncture and outcome—will be recorded. Participants  
26  
27 299 are discontinued if the treatments cause serious aggravation of symptoms, which will  
28  
29 300 include an 80% or more increase of existing heel pain measured by VAS at the end of  
30  
31 301 the first hour after acupuncture. Researchers will immediately report SAEs (e.g.,  
32  
33 302 requiring hospitalization, causing disability or impaired ability to work) to the  
34  
35 303 Medical Ethics Committee of Guang’anmen Hospital and suspend the study.  
36  
37  
38  
39  
40  
41  
42  
43

44 304

### 45 305 **Sample size calculation**

46  
47  
48 306 The null hypothesis is that the proportion of participants with at least a 50% decrease  
49  
50 307 from baseline in the worst pain intensity (as measured by the VAS at first steps in the  
51  
52 308 morning after the 4-week treatment) will be same for MA and EA. A decline by at  
53  
54 309 least 50% in the pain at first steps was regarded as clinically relevant.<sup>35</sup> The previous  
55  
56  
57  
58  
59  
60

1  
2  
3  
4 310 studies reported that 73.3% of the participants had at least a 50% decrease in the pain  
5  
6 311 as measured by the VAS at first steps after the 4-week EA treatment,<sup>36</sup> and 44.4%  
7  
8  
9 312 after the 4-week MA treatment.<sup>37</sup>Power was defined as 80% for an alpha of 5%.  
10  
11 313 Accordingly, 92 participants will be required (46 in each group), assuming a  
12  
13  
14 314 two-tailed test with 10% loss to follow-up.  
15  
16

315

### 316 **Statistical analysis**

317 We will use SPSS v20 software (IBM SPSS Statistics; IBM Corp, Somers, NY) to  
318 perform all statistical analysis following the intention-to-treat (ITT) principle. The  
319 confidence interval will be established at 95%, and the significance level at 0.05.  
320 Missing data will be calculated using the actual observational value without  
321 imputation if the dropout rate is no more than 10%. For continuous data, the data will  
322 be presented as mean  $\pm$  standard deviation when normally distributed or presented as  
323 median (interquartile range) when not normally distributed. The longitudinal  
324 continuous data will be compared between groups using repeated-measures ANOVA  
325 including group and time\*group interaction. The other continuous data will be  
326 analyzed Student's *t*-test and Wilcoxon rank sum test, and the categorical data using  
327 the Chi-squared test or Fisher's exact test, as appropriate. Sensitivity analysis will be  
328 performed if necessary. A P-value <0.05 will be considered statistically significant.

329

### 330 **Quality control**

1  
2  
3  
4 331 Prior to the trial, all staff will undergo special training on the purpose and content of  
5  
6 332 the trial, treatment strategies, and quality control. Acupuncturists in this trial will have  
7  
8  
9 333 an acupuncture license with at least 1-year of acupuncture experience. Monitors will  
10  
11 334 check case report forms once every week as well as the acupuncture operation during  
12  
13  
14 335 the treatment period. Drop-outs and withdrawals including the reasons will be detailed  
15  
16  
17 336 documented through the trial. Participants' information will be stored in locked file  
18  
19 337 cabinets at the study sites with limited access; only investigators have the right to  
20  
21  
22 338 access the data. All investigators will always maintain a strict privacy policy to  
23  
24  
25 339 protect confidentiality before, during and after the trial.

26  
27 340

#### 30 341 **Patient and public involvement**

31  
32 342 The initial concept of investigating whether EA was superior to MA in reducing  
33  
34 343 PHPS pain was first proposed by a patient who prefer EA rather than MA. No other  
35  
36  
37 344 patients will be in the recruitment and conduct of the study. The burden of the  
38  
39  
40 345 intervention will be assessed by patients themselves. The results will be disseminated  
41  
42  
43 346 to study participants via the website of our hospital.

44  
45 347

#### 48 348 **Ethics and dissemination**

49  
50 349 The study was planned in accordance with the Helsinki Declaration and was approved  
51  
52  
53 350 by the Ethical Committee of the Guang'anmen Hospital, China Academy of Chinese  
54  
55  
56 351 Medical Sciences (No. 2018-010-KY). The trial has been registered at Chinese  
57  
58  
59 352 Clinical Trial Registry. All the participants will be fully informed about this trial and  
60

1  
2  
3  
4 353 given enough time to inquire about details and decide whether to participate or not at  
5  
6 354 first visit. Participants will be asked to sign the informed consent form if they agree to  
7  
8  
9 355 participate. Any modifications to the protocol will be reported and approved by the  
10  
11 356 Ethical Committee of the Guang'anmen Hospital, China Academy of Chinese  
12  
13  
14 357 Medical Sciences and will be communicated with the trial registry, investigators and  
15  
16  
17 358 data monitoring researchers. The study findings will be disseminated through  
18  
19 359 presentation at a high-impact medical journal, with online access. We also plan to  
20  
21  
22 360 present it in select conferences and scientific meetings after the paper about this trial'  
23  
24  
25 361 results published.

26  
27 362

### 30 363 **Discussion**

31  
32 364 The results of this study will clarify the effect of EA compared with MA in treating  
33  
34  
35 365 PHPS. There were several trials assessing EA and MA in the treatment of PHPS.<sup>36 38</sup>  
36  
37 366 <sup>39</sup> The results have already showed that EA or MA coupled with conventional  
38  
39  
40 367 treatments could reduce pain, disabilities, and activity limitations in patients with  
41  
42  
43 368 PHPS compared with conventional treatments.<sup>36 38</sup>

44  
45 369 According to some previous studies, EA can produce a faster and better analgesic  
46  
47  
48 370 effect than MA.<sup>22 23</sup> However, no studies have reported the effect of head-to-head  
49  
50  
51 371 comparison between EA and MA in the treatment of PHPS. This trial comparing EA  
52  
53  
54 372 with MA could fill a gap in the literature thus helping physical therapists and  
55  
56 373 acupuncturists in their clinical decision-making.

1  
2  
3  
4 374 The VAS is one of the most commonly used instruments for assessment of pain  
5  
6 375 and has been validated to detect changes in pain intensity.<sup>40</sup> Moreover, it has also  
7  
8  
9 376 been used in many studies applying acupuncture for PHPS.<sup>38 39</sup> Because morning pain  
10  
11 377 localized to the plantar medial aspect of the heel is the distinct feature of PHPS, we  
12  
13  
14 378 will choose the proportion of participant with a decline of at least 50% in the worst  
15  
16  
17 379 pain intensity at first steps in the morning after 4-week treatment compared with  
18  
19  
20 380 baseline as the primary outcome.

21  
22 381 The result may help clarify the effect of EA compared with MA on the pain relief  
23  
24 382 of PHPS. In addition, considering that pain of PHPS can be categorized as pressure  
25  
26  
27 383 pain, PPT (which will be evaluated by an algometer) could be a reasonable objective  
28  
29  
30 384 secondary outcome to help investigating physiological changes of PHPS. Moreover,  
31  
32  
33 385 DFROM measured by a digital goniometer and FAAM are well suited for evaluating  
34  
35  
36 386 the effects of acupuncture treatment for PHPS. These would be supportive of the  
37  
38 387 primary outcome and meaningful for the overall effectiveness evaluation.

39  
40 388 Strengths of the study include its strictly standardized endpoints and objective  
41  
42  
43 389 criteria, long-term follow-up, strict quality control, and evaluation of patients'  
44  
45  
46 390 expectations for acupuncture. The trial also has some limitations. First, this is a  
47  
48  
49 391 single-center study conducted at a tertiary A hospital in China and the results might  
50  
51  
52 392 not apply to primary hospital or other countries. Second, participants and the  
53  
54  
55 393 acupuncturist will not be blinded due to the nature of the study, which might bring  
56  
57  
58 394 bias and influence the results. Third, considering ethics and the acceptance of  
59  
60 395 participants, we did not assign a placebo/sham/ wait list group, which could not

1  
2  
3  
4  
5  
6  
7  
8  
9  
10  
11  
12  
13  
14  
15  
16  
17  
18  
19  
20  
21  
22  
23  
24  
25  
26  
27  
28  
29  
30  
31  
32  
33  
34  
35  
36  
37  
38  
39  
40  
41  
42  
43  
44  
45  
46  
47  
48  
49  
50  
51  
52  
53  
54  
55  
56  
57  
58  
59  
60

396 exclude the placebo effect of acupuncture and a possible spontaneous remission of the  
397 PHPS. Fourth, this study mainly focuses on Ashi points, BL57, KI3 and BL60 for  
398 PHPS, so that the findings may not be extended to other points for the same condition.

For peer review only

1  
2  
3  
4 399 **Trial status:** No recruitment at the present.  
5

6 400 **Ethical Approval and Consent to participate** The study protocol has received  
7  
8  
9 401 approval from the Institutional Review Boards of Guang'anmen Hospital in China  
10  
11 402 (approval NO. 2018-010-KY, TEL +86-10-88001552), and all investigators will  
12  
13  
14 403 comply with the Helsinki Declaration.  
15

16  
17 404 **Consent for publication** Not applicable.  
18

19 405 **Availability of data and materials** All data are fully available without restriction.  
20

21  
22 406 **Competing interests** The authors declare that they have no competing interests.  
23  
24

25 407  
26  
27 408 **Authors' contributions** Zhishun Liu is responsible for supervising the clinical study  
28  
29 409 and for communicating important protocol modifications to relevant parties. Weiming  
30  
31 410 Wang and Zhishun Liu conceived the idea and designed this trial. Ruimin Jiao are  
32  
33 411 responsible for the recruitment and treatment of patients. Yan Liu and Jie Zhao are  
34  
35 412 responsible for statistical analysis. This manuscript was drafted by Weiming Wang  
36  
37 413 and revised by Zhishun Liu. All authors read and approved the final draft of the  
38  
39 414 manuscript.  
40  
41  
42  
43  
44

45 415  
46  
47 416 **Acknowledgments** The authors appreciate the support and efforts from people who  
48  
49 417 have been or will be included in this study. The authors are also grateful of the  
50  
51 418 contribution of our patient adviser (Yang Wang) in the implementation this trial. The  
52  
53 419 authors would like to offer their sincere thanks to *Medjaden Bioscience Limited* for  
54  
55 420 their editing work.  
56  
57  
58  
59  
60



1  
2  
3 422  
45 423 **References**

- 6  
7  
8 424 1. Petraglia F, Ramazzina I, Costantino C. Plantar fasciitis in athletes: diagnostic and  
9  
10 425 treatment strategies. A systematic review. *Muscles Ligaments Tendons J*  
11  
12  
13 426 2017;7(1):107-18.  
14  
15 427 2. Thompson JV, Saini SS, Reb CW, *et al.* Diagnosis and management of plantar  
16  
17 428 fasciitis. *J Am Osteopath Assoc* 2014;114(12):900-6.  
18  
19  
20 429 3. Gill LH. Plantar Fasciitis: Diagnosis and Conservative Management. *J Am Acad*  
21  
22 430 *Orthop Surg* 1997;5(2):109-17.  
23  
24  
25 431 4. Tong KB, Furia J. Economic burden of plantar fasciitis treatment in the United  
26  
27 432 States. *Am J Orthop (Belle Mead NJ)* 2010;39(5): 227-31.  
28  
29  
30 433 5. Riddle DL, Pulisic M, Pidcoe P, *et al.* Risk factors for Plantar fasciitis: a matched  
31  
32 434 case-control study. *J Bone Joint Surg Am* 2003;85-A:872-77.  
33  
34  
35 435 6. S K Neufeld, R Cerrato. Plantar fasciitis: evaluation and treatment. *J Am Acad*  
36  
37 436 *Orthop Surg* 2008;16 (6):338-46.  
38  
39  
40 437 7. Healey K, Chen K. Plantar fasciitis: Current diagnostic modalities and treatments.  
41  
42 438 *Clin Podiatr Med Surg* 2010;27 (3): 369-80.  
43  
44  
45 439 8. Toomey EP. Plantar heel pain. *Foot Ankle Clin* 2009;14 (2):229-45.  
46  
47  
48 440 9. Cutts S, Obi N, Pasapula C, *et al.* Plantar fasciitis. *Ann R Coll Surg Engl* 2012;94  
49  
50 441 (8): 539-42.  
51  
52  
53 442 10. Irving DB, Cook JL, Young MA, *et al.* Impact of chronic plantar heel pain on  
54  
55 443 health-related quality of life. *J Am Podiatr Med Assoc* 2008;98(4):283-89.  
56  
57  
58  
59  
60

- 1  
2  
3  
4 444 11. Johnson RE, Haas K, Lindow K, *et al*. Plantar fasciitis: what is  
5  
6 445 the diagnosis and treatment? *Orthop Nurs* 2014;33(4):198-204  
7  
8  
9 446 12. Wolgin M, Cook C, Graham C, *et al*. Conservative treatment of plantar heel pain:  
10  
11 447 long-term follow-up. *Foot Ankle Int* 1994;15: 97-102.  
12  
13  
14 448 13. David JA, Sankarapandian V, Christopher PR, *et al*.  
15  
16 449 Injected corticosteroids for treating plantar heel pain in adults. *Cochrane Database*  
17  
18 450 *Syst Rev* 2017 11;6:CD009348.  
19  
20  
21  
22 451 14. Thomas JL, Christensen JC, Kravitz SR, *et al*. American College of Foot and  
23  
24 452 Ankle Surgeons Heel Pain Committee. The diagnosis and treatment of heel pain: a  
25  
26 453 clinical practice guideline—revision 2010. *J Foot Ankle Surg* 2010;49 (3  
27  
28 454 suppl):S1-S19. doi:10.1053/j.jfas. 2010.01.001.  
29  
30  
31  
32 455 15. Goff JD, Crawford R. Diagnosis and treatment of plantar fasciitis. *Am Fam*  
33  
34 456 *Physician* 2011, 84: 676-82.  
35  
36  
37 457 16. Vickers A, Wilson P, Kleijnen J. Acupuncture. *Qual Saf Health Care*  
38  
39 458 2002;11:92–7.  
40  
41  
42  
43 459 17. Clark MT, Clark RJ, Toohey S, Bradbury-Jones C. Rationales and treatment  
44  
45 460 approaches underpinning the use of acupuncture and related techniques for plantar  
46  
47 461 heel pain: a critical interpretive synthesis. *Acupunct Med* 2017;35(1):9-16.  
48  
49  
50  
51 462 18. Wong JY, Rapson LM. Acupuncture in the management of pain of  
52  
53 463 musculoskeletal and neurologic origin. *Phys Med Rehabil Clin N Am*  
54  
55 464 1999;10(3):531-45  
56  
57  
58  
59  
60

- 1  
2  
3  
4 465 19. Clark RJ, Tighe M. The effectiveness of acupuncture for plantar heel pain: a  
5  
6 466 systematic review. *Acupunct Med* 2012;30(4):298-306.  
7  
8  
9 467 20. Thiagarajah AG. How effective is acupuncture for reducing pain due to plantar  
10  
11 468 fasciitis? *Singapore Med J* 2017;58(2):92-7.  
12  
13  
14 469 21. Yu Z, Luo L, Li Y, *et al.* Different manual manipulations and electrical  
15  
16 470 parameters exert different therapeutic effects of acupuncture. *J Tradit Chin*  
17  
18 471 *Med* 2014;34(6):754-8.  
19  
20  
21 472 22. Comachio J, Oliveira Magalhães M, Nogueira Burke T, *et al.* Efficacy of  
22  
23 473 acupuncture and electroacupuncture in patients with nonspecific low back pain:  
24  
25 474 study protocol for a randomized controlled trial. *Trials* 2015;16: 469.  
26  
27  
28 475 23. Schliessbach J, van der Klift E, Arendt-Nielsen L, *et al.* The effect of brief  
29  
30 476 electrical and manual acupuncture stimulation on mechanical experimental pain.  
31  
32 477 *Pain Med* 2011;12(2):268-75.  
33  
34  
35 478 24. Chan AW, Tetzlaff JM, Gøtzsche PC, *et al.* SPIRIT 2013 explanation and  
36  
37 479 elaboration: guidance for protocols of clinical trials. *BMJ* 2013; 346: e7586.  
38  
39  
40 480 25. MacPherson H, Altman DG, Hammerschlag R, *et al.* Revised standards for  
41  
42 481 reporting interventions in clinical trials of acupuncture (STRICTA): extending the  
43  
44 482 CONSORT statement. *J Evid Based Med* 2010;3:140-55.  
45  
46  
47 483 26. Martin RL, Davenport TE, Reischl SF, *et al.* Heel pain–plantar fasciitis: revision  
48  
49 484 2014. *J Orthop Sports Phys Ther* 2014;44(11): A1-33.  
50  
51  
52 485 27. Lee TL, Marx BL. Noninvasive, Multimodality Approach to Treating Plantar  
53  
54 486 Fasciitis: A Case Study. *J Acupunct Meridian Stud.* 2018;11(4):162-4.  
55  
56  
57  
58  
59  
60

- 1  
2  
3  
4 487 28. Jin GY, Jin JJX, Jin LL. Contemporary medical acupuncture: a systems approach.  
5  
6 488 Beijing: High Education Press, Springer; 2007.  
7  
8  
9 489 29. Standardization Administration of the People's Republic of China. GB/  
10  
11 490 T12346-2006, Nomenclature and Location of Acupuncture Points [S].2006.  
12  
13  
14 491 30. Zhou K, Fang J, Wang X, *et al*. Characterization of de qi with electroacupuncture  
15  
16 492 at acupoints with different properties. *J Altern Complement Med* 2011; 17:  
17  
18 493 1007-13.  
19  
20  
21 494 31. Vanderweeen L, Oostendorp RA, Vaes P, *et al*. Pressure algometry in manual  
22  
23 495 therapy. *Man Ther* 1996;1(5):258-65.  
24  
25  
26 496 32. Fong CM, Blackburn JT, Norcross MF, *et al*. Ankle-Dorsiflexion Range of  
27  
28 497 Motion and Landing Biomechanics. *J Athl Train* 2011;46(1):5-10  
29  
30  
31 498 33. Martin R. Foot and Ankle Ability Measure (FAAM).  
32  
33 499 <http://www.healthsciences.duq.edu/pdf/FAAM12-051.pdf>. Accessed March 23,  
34  
35 500 2018.  
36  
37  
38 501 34. González-Sánchez M, Li GZ, Ruiz Muñoz, *et al*. Foot and ankle ability measure  
39  
40 502 to measure functional limitations in patients with foot and ankle disorders: a  
41  
42 503 Chinese cross-cultural adaptation and validation. *Disabil Rehabil* 2017,39(21),  
43  
44 504 2182-9.  
45  
46  
47 505 35. Farrar JT, Young JP Jr, LaMoreaux L, *et al*. Clinical importance of changes in  
48  
49 506 chronic pain intensity measured on an 11-point numerical pain rating scale. *Pain*  
50  
51 507 2001,94(2):149-158.  
52  
53  
54  
55  
56  
57  
58  
59  
60

- 1  
2  
3  
4 508 36. Kumnerddee W, Pattapong N. Efficacy of Electro-Acupuncture in Chronic Plantar  
5  
6 509 Fasciitis: A Randomized Controlled Trial. *Am J Chin Med* 2012;40(6):1167-76.  
7  
8  
9 510 37. Tillu A, Gupta S. Effect of Acupuncture Treatment on Heel Pain due to Plantar  
10  
11 511 Fasciitis. *Acupunct Med* 1998;16:66-8.  
12  
13  
14 512 38. Zhang SP, Yip TP, Li QS. Acupuncture treatment for plantar fasciitis: a  
15  
16 513 randomized controlled trial with six months follow-up. *Evid Based Complement*  
17  
18 514 *Alternat Med* 2011; 2011: 154108.  
19  
20  
21  
22 515 39. Karagounis P, Tsironi M, Prionas G, *et al.* Treatment of plantar fasciitis in  
23  
24 516 recreational athletes: two different therapeutic protocols. *Foot Ankle Spec* 2011;  
25  
26 517 4:226-34.  
27  
28  
29  
30 518 40. Vixner L, Schytt E, Stener-Victorin E, *et al.* Acupuncture with manual and  
31  
32 519 electrical stimulation for labour pain: a longitudinal randomised controlled trial.  
33  
34 520 *BMC Complement Altern Med* 2014; 9;14: 187.  
35  
36  
37  
38  
39  
40  
41  
42  
43  
44  
45  
46  
47  
48  
49  
50  
51  
52  
53  
54  
55  
56  
57  
58  
59  
60

1  
2  
3  
4 522 **Figure legends**  
5

6 523 Figure 1: Trial flow diagram  
7

8  
9 524 Figure 2: The time point of assessment  
10

11 525  
12  
13  
14  
15  
16  
17  
18  
19  
20  
21  
22  
23  
24  
25  
26  
27  
28  
29  
30  
31  
32  
33  
34  
35  
36  
37  
38  
39  
40  
41  
42  
43  
44  
45  
46  
47  
48  
49  
50  
51  
52  
53  
54  
55  
56  
57  
58  
59  
60

For peer review only

1  
2  
3  
4  
5  
6  
7  
8  
9  
10  
11  
12  
13  
14  
15  
16  
17  
18  
19  
20  
21  
22  
23  
24  
25  
26  
27  
28  
29  
30  
31  
32  
33  
34  
35  
36  
37  
38  
39  
40  
41  
42  
43  
44  
45  
46  
47  
48  
49  
50  
51  
52  
53  
54  
55  
56  
57  
58  
59  
60

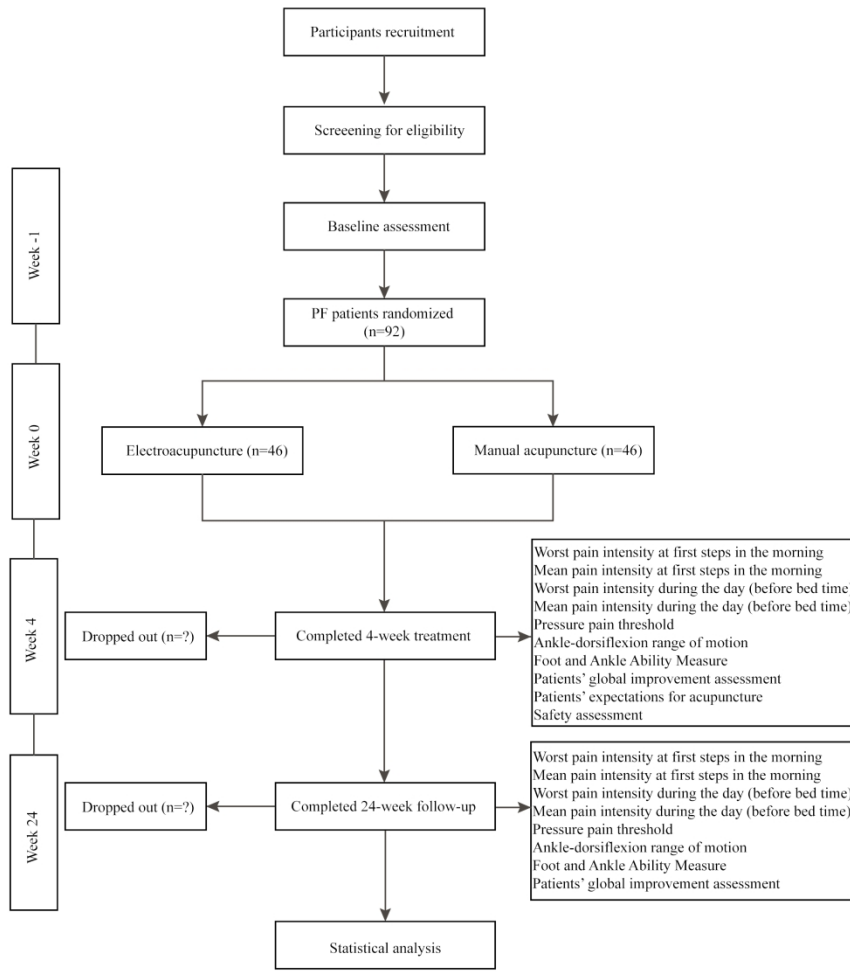

Figure 1. Trial flow diagram

Figure 1: Trial flow diagram  
234x277mm (300 x 300 DPI)

| TIME POINT (W, week)                                  | Study Period |            |             |           |         |
|-------------------------------------------------------|--------------|------------|-------------|-----------|---------|
|                                                       | Baseline     | Allocation | Treatment   | Follow-up |         |
|                                                       |              |            | W 4±2d      | W 16±3d   | W 24±3d |
| <b>Enrollment</b>                                     |              |            |             |           |         |
| Eligibility criteria                                  | ×            |            |             |           |         |
| Demography characteristics                            | ×            |            |             |           |         |
| Disease history of PF                                 | ×            |            |             |           |         |
| Eligibility screen                                    | ×            |            |             |           |         |
| Informed consent                                      | ×            |            |             |           |         |
| Allocation                                            |              | ×          |             |           |         |
| <b>Interventions</b>                                  |              |            |             |           |         |
| Electroacupuncture                                    |              |            | ×(weeks1-4) |           |         |
| Manual acupuncture                                    |              |            | ×(weeks1-4) |           |         |
| <b>Assessments</b>                                    |              |            |             |           |         |
| Worst pain intensity at first steps in the morning    | ×            |            | ×           | ×         | ×       |
| Mean pain intensity at first steps in the morning     | ×            |            | ×           | ×         | ×       |
| Worst pain intensity during the day (before bed time) | ×            |            | ×           | ×         | ×       |
| Mean pain intensity during the day (before bed time)  | ×            |            | ×           | ×         | ×       |
| Pressure pain threshold                               | ×            |            | ×           | ×         | ×       |
| Ankle-dorsiflexion range of motion                    | ×            |            | ×           | ×         | ×       |
| Foot and Ankle Ability Measure                        | ×            |            | ×           | ×         | ×       |
| Patients' global improvement assessment               | ×            |            | ×           | ×         | ×       |
| Patients' expectations for acupuncture                | ×            |            |             |           |         |
| Adverse events                                        |              |            | ×           |           |         |
| Safety assessment                                     |              |            | ×           | ×         | ×       |

Figure 2: The time point of assessment

Figure 2: The time point of assessment

210x297mm (300 x 300 DPI)



Table 1

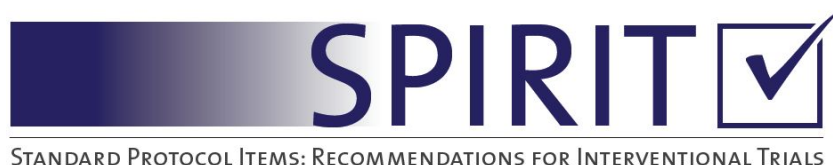

SPIRIT 2013 Checklist: Recommended items to address in a clinical trial protocol and related documents\*

| Section/item                      | Item No | Description                                                                                                                                                                                                                                                                              | Addressed on page number |
|-----------------------------------|---------|------------------------------------------------------------------------------------------------------------------------------------------------------------------------------------------------------------------------------------------------------------------------------------------|--------------------------|
| <b>Administrative information</b> |         |                                                                                                                                                                                                                                                                                          |                          |
| Title                             | 1       | Descriptive title identifying the study design, population, interventions, and, if applicable, trial acronym                                                                                                                                                                             | 1                        |
| Trial registration                | 2a      | Trial identifier and registry name. If not yet registered, name of intended registry                                                                                                                                                                                                     | 3                        |
|                                   | 2b      | All items from the World Health Organization Trial Registration Data Set                                                                                                                                                                                                                 | NA                       |
| Protocol version                  | 3       | Date and version identifier                                                                                                                                                                                                                                                              | 3                        |
| Funding                           | 4       | Sources and types of financial, material, and other support                                                                                                                                                                                                                              | 1                        |
| Roles and responsibilities        | 5a      | Names, affiliations, and roles of protocol contributors                                                                                                                                                                                                                                  | 1,19                     |
|                                   | 5b      | Name and contact information for the trial sponsor                                                                                                                                                                                                                                       | 1                        |
|                                   | 5c      | Role of study sponsor and funders, if any, in study design; collection, management, analysis, and interpretation of data; writing of the report; and the decision to submit the report for publication, including whether they will have ultimate authority over any of these activities | 19                       |
|                                   | 5d      | Composition, roles, and responsibilities of the coordinating centre, steering committee, endpoint adjudication committee, data management team, and other individuals or groups overseeing the trial, if applicable (see Item 21a for data monitoring committee)                         | 17, 7                    |

## Introduction

|                          |    |                                                                                                                                                                                                           |     |
|--------------------------|----|-----------------------------------------------------------------------------------------------------------------------------------------------------------------------------------------------------------|-----|
| Background and rationale | 6a | Description of research question and justification for undertaking the trial, including summary of relevant studies (published and unpublished) examining benefits and harms for each intervention        | 4-6 |
|                          | 6b | Explanation for choice of comparators                                                                                                                                                                     | 6   |
| Objectives               | 7  | Specific objectives or hypotheses                                                                                                                                                                         | 6   |
| Trial design             | 8  | Description of trial design including type of trial (eg, parallel group, crossover, factorial, single group), allocation ratio, and framework (eg, superiority, equivalence, noninferiority, exploratory) | 6   |

## Methods: Participants, interventions, and outcomes

|                      |     |                                                                                                                                                                                                                                                                                                                                                                                |       |
|----------------------|-----|--------------------------------------------------------------------------------------------------------------------------------------------------------------------------------------------------------------------------------------------------------------------------------------------------------------------------------------------------------------------------------|-------|
| Study setting        | 9   | Description of study settings (eg, community clinic, academic hospital) and list of countries where data will be collected. Reference to where list of study sites can be obtained                                                                                                                                                                                             | 6     |
| Eligibility criteria | 10  | Inclusion and exclusion criteria for participants. If applicable, eligibility criteria for study centres and individuals who will perform the interventions (eg, surgeons, psychotherapists)                                                                                                                                                                                   | 7-8   |
| Interventions        | 11a | Interventions for each group with sufficient detail to allow replication, including how and when they will be administered                                                                                                                                                                                                                                                     | 9-10  |
|                      | 11b | Criteria for discontinuing or modifying allocated interventions for a given trial participant (eg, drug dose change in response to harms, participant request, or improving/worsening disease)                                                                                                                                                                                 | 14    |
|                      | 11c | Strategies to improve adherence to intervention protocols, and any procedures for monitoring adherence (eg, drug tablet return, laboratory tests)                                                                                                                                                                                                                              | No    |
|                      | 11d | Relevant concomitant care and interventions that are permitted or prohibited during the trial                                                                                                                                                                                                                                                                                  | 11    |
| Outcomes             | 12  | Primary, secondary, and other outcomes, including the specific measurement variable (eg, systolic blood pressure), analysis metric (eg, change from baseline, final value, time to event), method of aggregation (eg, median, proportion), and time point for each outcome. Explanation of the clinical relevance of chosen efficacy and harm outcomes is strongly recommended | 11-14 |

|                      |    |                                                                                                                                                                                       |          |
|----------------------|----|---------------------------------------------------------------------------------------------------------------------------------------------------------------------------------------|----------|
| Participant timeline | 13 | Time schedule of enrolment, interventions (including any run-ins and washouts), assessments, and visits for participants. A schematic diagram is highly recommended (see Figure)      | Figure 2 |
| Sample size          | 14 | Estimated number of participants needed to achieve study objectives and how it was determined, including clinical and statistical assumptions supporting any sample size calculations | 15       |
| Recruitment          | 15 | Strategies for achieving adequate participant enrolment to reach target sample size                                                                                                   | 6        |

### Methods: Assignment of interventions (for controlled trials)

#### Allocation:

|                                  |     |                                                                                                                                                                                                                                                                                                                                                          |    |
|----------------------------------|-----|----------------------------------------------------------------------------------------------------------------------------------------------------------------------------------------------------------------------------------------------------------------------------------------------------------------------------------------------------------|----|
| Sequence generation              | 16a | Method of generating the allocation sequence (eg, computer-generated random numbers), and list of any factors for stratification. To reduce predictability of a random sequence, details of any planned restriction (eg, blocking) should be provided in a separate document that is unavailable to those who enrol participants or assign interventions | 7  |
| Allocation concealment mechanism | 16b | Mechanism of implementing the allocation sequence (eg, central telephone; sequentially numbered, opaque, sealed envelopes), describing any steps to conceal the sequence until interventions are assigned                                                                                                                                                | 7  |
| Implementation                   | 16c | Who will generate the allocation sequence, who will enrol participants, and who will assign participants to interventions                                                                                                                                                                                                                                | 7  |
| Blinding (masking)               | 17a | Who will be blinded after assignment to interventions (eg, trial participants, care providers, outcome assessors, data analysts), and how                                                                                                                                                                                                                | 7  |
|                                  | 17b | If blinded, circumstances under which unblinding is permissible, and procedure for revealing a participant's allocated intervention during the trial                                                                                                                                                                                                     | NA |

### Methods: Data collection, management, and analysis

|                         |     |                                                                                                                                                                                                                                                                                                                                                                                                              |    |
|-------------------------|-----|--------------------------------------------------------------------------------------------------------------------------------------------------------------------------------------------------------------------------------------------------------------------------------------------------------------------------------------------------------------------------------------------------------------|----|
| Data collection methods | 18a | Plans for assessment and collection of outcome, baseline, and other trial data, including any related processes to promote data quality (eg, duplicate measurements, training of assessors) and a description of study instruments (eg, questionnaires, laboratory tests) along with their reliability and validity, if known. Reference to where data collection forms can be found, if not in the protocol | 16 |
|-------------------------|-----|--------------------------------------------------------------------------------------------------------------------------------------------------------------------------------------------------------------------------------------------------------------------------------------------------------------------------------------------------------------------------------------------------------------|----|

|                     |     |                                                                                                                                                                                                                                                                   |    |
|---------------------|-----|-------------------------------------------------------------------------------------------------------------------------------------------------------------------------------------------------------------------------------------------------------------------|----|
|                     | 18b | Plans to promote participant retention and complete follow-up, including list of any outcome data to be collected for participants who discontinue or deviate from intervention protocols                                                                         | 16 |
| Data management     | 19  | Plans for data entry, coding, security, and storage, including any related processes to promote data quality (eg, double data entry; range checks for data values). Reference to where details of data management procedures can be found, if not in the protocol | NA |
| Statistical methods | 20a | Statistical methods for analysing primary and secondary outcomes. Reference to where other details of the statistical analysis plan can be found, if not in the protocol                                                                                          | 15 |
|                     | 20b | Methods for any additional analyses (eg, subgroup and adjusted analyses)                                                                                                                                                                                          | 15 |
|                     | 20c | Definition of analysis population relating to protocol non-adherence (eg, as randomised analysis), and any statistical methods to handle missing data (eg, multiple imputation)                                                                                   | 15 |

### Methods: Monitoring

|                 |     |                                                                                                                                                                                                                                                                                                                                       |    |
|-----------------|-----|---------------------------------------------------------------------------------------------------------------------------------------------------------------------------------------------------------------------------------------------------------------------------------------------------------------------------------------|----|
| Data monitoring | 21a | Composition of data monitoring committee (DMC); summary of its role and reporting structure; statement of whether it is independent from the sponsor and competing interests; and reference to where further details about its charter can be found, if not in the protocol. Alternatively, an explanation of why a DMC is not needed | NA |
|                 | 21b | Description of any interim analyses and stopping guidelines, including who will have access to these interim results and make the final decision to terminate the trial                                                                                                                                                               | NA |
| Harms           | 22  | Plans for collecting, assessing, reporting, and managing solicited and spontaneously reported adverse events and other unintended effects of trial interventions or trial conduct                                                                                                                                                     | 14 |
| Auditing        | 23  | Frequency and procedures for auditing trial conduct, if any, and whether the process will be independent from investigators and the sponsor                                                                                                                                                                                           | 16 |

### Ethics and dissemination

|                          |    |                                                                                           |   |
|--------------------------|----|-------------------------------------------------------------------------------------------|---|
| Research ethics approval | 24 | Plans for seeking research ethics committee/institutional review board (REC/IRB) approval | 3 |
|--------------------------|----|-------------------------------------------------------------------------------------------|---|

|    |                   |     |                                                                                   |    |
|----|-------------------|-----|-----------------------------------------------------------------------------------|----|
| 1  |                   |     |                                                                                   |    |
| 2  |                   |     |                                                                                   |    |
| 3  |                   |     |                                                                                   |    |
| 4  |                   |     |                                                                                   |    |
| 5  | Protocol          | 25  | Plans for communicating important protocol modifications (eg, changes to          | 17 |
| 6  | amendments        |     | eligibility criteria, outcomes, analyses) to relevant parties (eg, investigators, |    |
| 7  |                   |     | REC/IRBs, trial participants, trial registries, journals, regulators)             |    |
| 8  |                   |     |                                                                                   |    |
| 9  | Consent or        | 26a | Who will obtain informed consent or assent from potential trial participants      | 7  |
| 10 | assent            |     | or authorised surrogates, and how (see Item 32)                                   |    |
| 11 |                   |     |                                                                                   |    |
| 12 |                   | 26b | Additional consent provisions for collection and use of participant data and      | NA |
| 13 |                   |     | biological specimens in ancillary studies, if applicable                          |    |
| 14 |                   |     |                                                                                   |    |
| 15 |                   |     |                                                                                   |    |
| 16 | Confidentiality   | 27  | How personal information about potential and enrolled participants will be        | 16 |
| 17 |                   |     | collected, shared, and maintained in order to protect confidentiality before,     |    |
| 18 |                   |     | during, and after the trial                                                       |    |
| 19 |                   |     |                                                                                   |    |
| 20 | Declaration of    | 28  | Financial and other competing interests for principal investigators for the       | 20 |
| 21 | interests         |     | overall trial and each study site                                                 |    |
| 22 |                   |     |                                                                                   |    |
| 23 |                   |     |                                                                                   |    |
| 24 | Access to         | 29  | Statement of who will have access to the final trial dataset, and disclosure      | 16 |
| 25 | data              |     | of contractual agreements that limit such access for investigators                |    |
| 26 |                   |     |                                                                                   |    |
| 27 | Ancillary and     | 30  | Provisions, if any, for ancillary and post-trial care, and for compensation to    | NA |
| 28 | post-trial care   |     | those who suffer harm from trial participation                                    |    |
| 29 |                   |     |                                                                                   |    |
| 30 | Dissemination     | 31a | Plans for investigators and sponsor to communicate trial results to               | 17 |
| 31 | policy            |     | participants, healthcare professionals, the public, and other relevant groups     |    |
| 32 |                   |     | (eg, via publication, reporting in results databases, or other data sharing       |    |
| 33 |                   |     | arrangements), including any publication restrictions                             |    |
| 34 |                   |     |                                                                                   |    |
| 35 |                   |     |                                                                                   |    |
| 36 |                   | 31b | Authorship eligibility guidelines and any intended use of professional            | 20 |
| 37 |                   |     | writers                                                                           |    |
| 38 |                   |     |                                                                                   |    |
| 39 |                   | 31c | Plans, if any, for granting public access to the full protocol, participant-level | NA |
| 40 |                   |     | dataset, and statistical code                                                     |    |
| 41 |                   |     |                                                                                   |    |
| 42 |                   |     |                                                                                   |    |
| 43 | <b>Appendices</b> |     |                                                                                   |    |
| 44 |                   |     |                                                                                   |    |
| 45 | Informed          | 32  | Model consent form and other related documentation given to participants          | NA |
| 46 | consent           |     | and authorised surrogates                                                         |    |
| 47 | materials         |     |                                                                                   |    |
| 48 |                   |     |                                                                                   |    |
| 49 | Biological        | 33  | Plans for collection, laboratory evaluation, and storage of biological            | NA |
| 50 | specimens         |     | specimens for genetic or molecular analysis in the current trial and for          |    |
| 51 |                   |     | future use in ancillary studies, if applicable                                    |    |
| 52 |                   |     |                                                                                   |    |
| 53 |                   |     |                                                                                   |    |
| 54 |                   |     |                                                                                   |    |
| 55 |                   |     |                                                                                   |    |
| 56 |                   |     |                                                                                   |    |
| 57 |                   |     |                                                                                   |    |
| 58 |                   |     |                                                                                   |    |
| 59 |                   |     |                                                                                   |    |
| 60 |                   |     |                                                                                   |    |

1  
2  
3  
4  
5 \*It is strongly recommended that this checklist be read in conjunction with the SPIRIT 2013 Explanation &  
6 Elaboration for important clarification on the items. Amendments to the protocol should be tracked and dated.  
7 The SPIRIT checklist is copyrighted by the SPIRIT Group under the Creative Commons "[Attribution-  
8 NonCommercial-NoDerivs 3.0 Unported](#)" license.  
9  
10  
11  
12  
13  
14  
15  
16  
17  
18  
19  
20  
21  
22  
23  
24  
25  
26  
27  
28  
29  
30  
31  
32  
33  
34  
35  
36  
37  
38  
39  
40  
41  
42  
43  
44  
45  
46  
47  
48  
49  
50  
51  
52  
53  
54  
55  
56  
57  
58  
59  
60
